# Supplementary material for: KYNU as a Biomarker of Tumor-Associated Macrophages and Correlates with Immunosuppressive Microenvironment and Poor Prognosis in Gastric Cancer
Source: Hindawi journal article supplement (doi:10.1155/2023/4662480), 2023-11-02

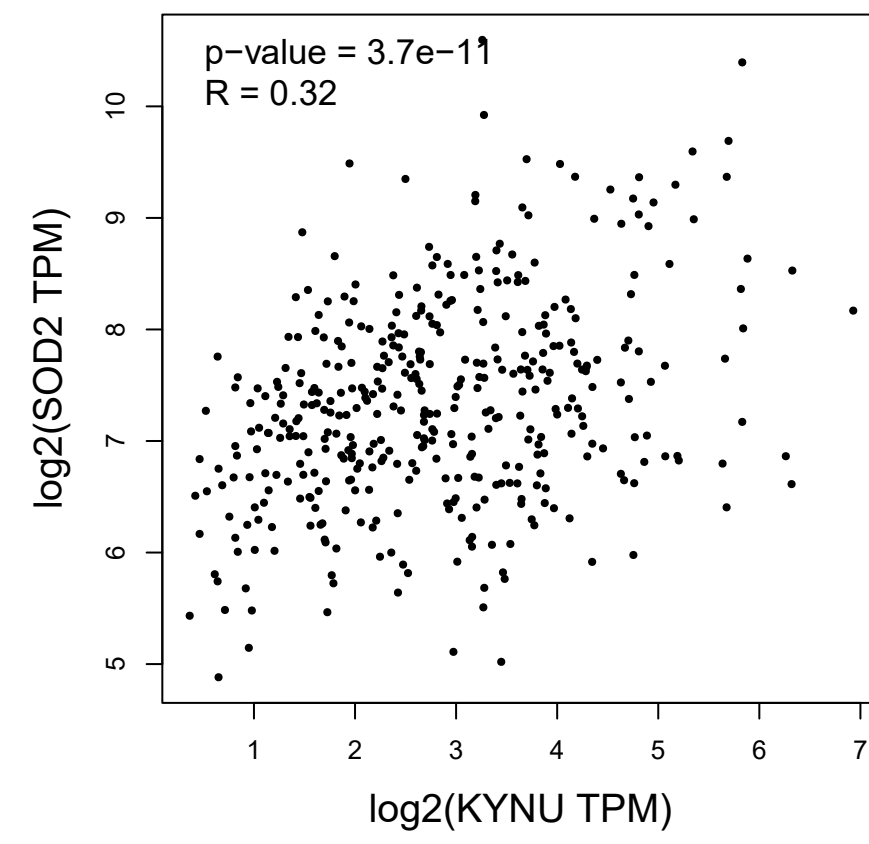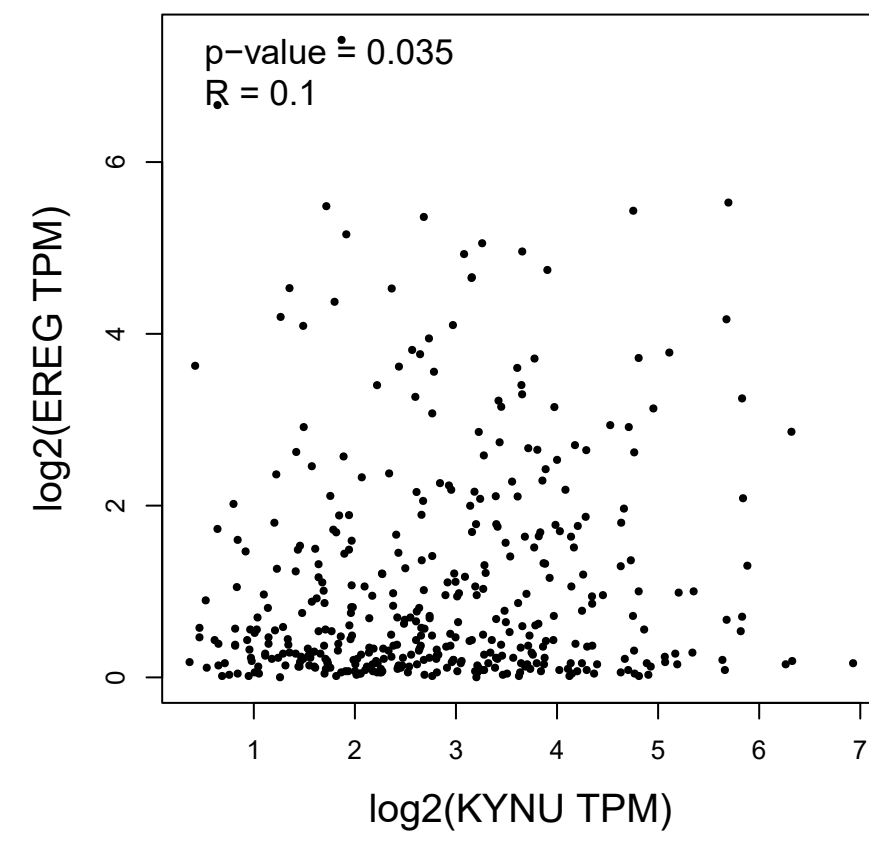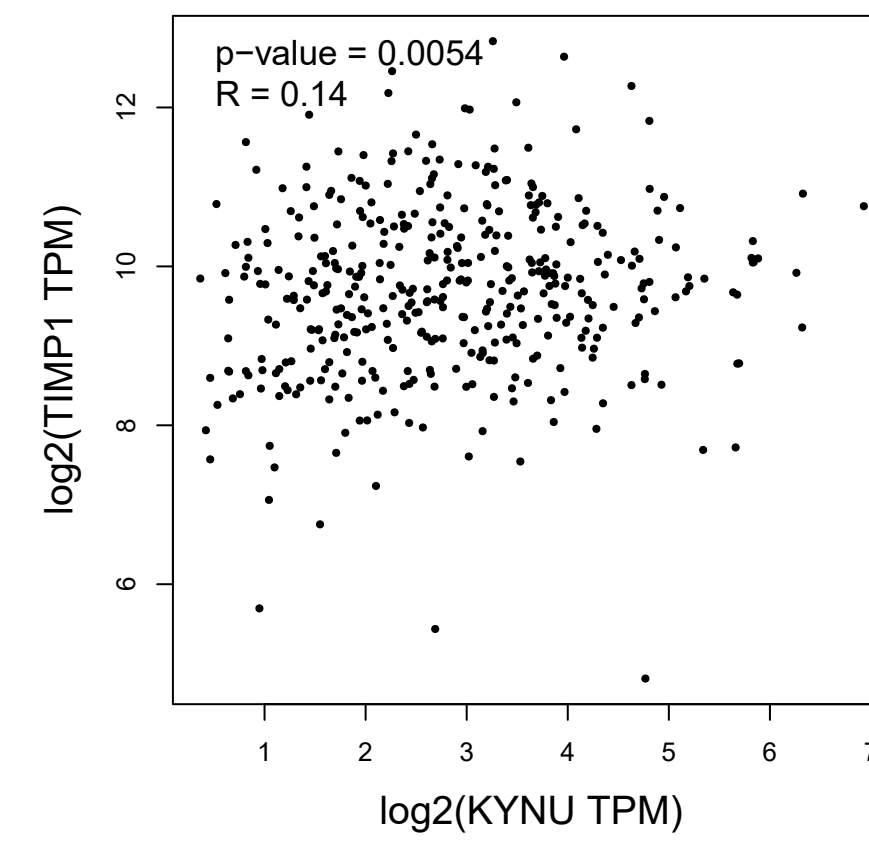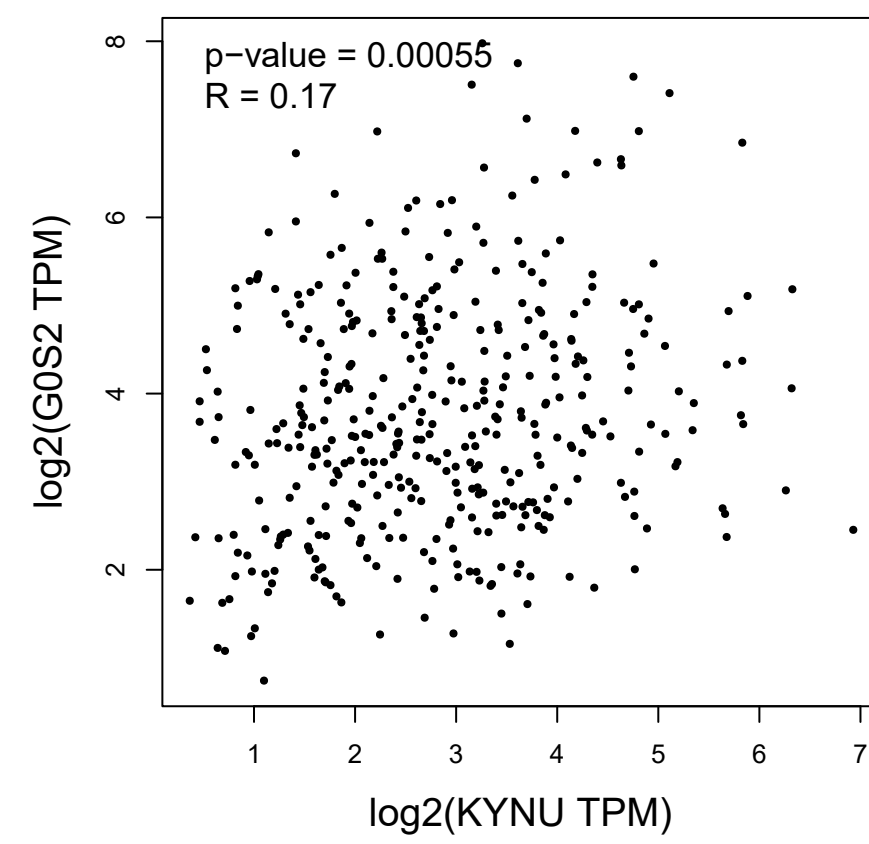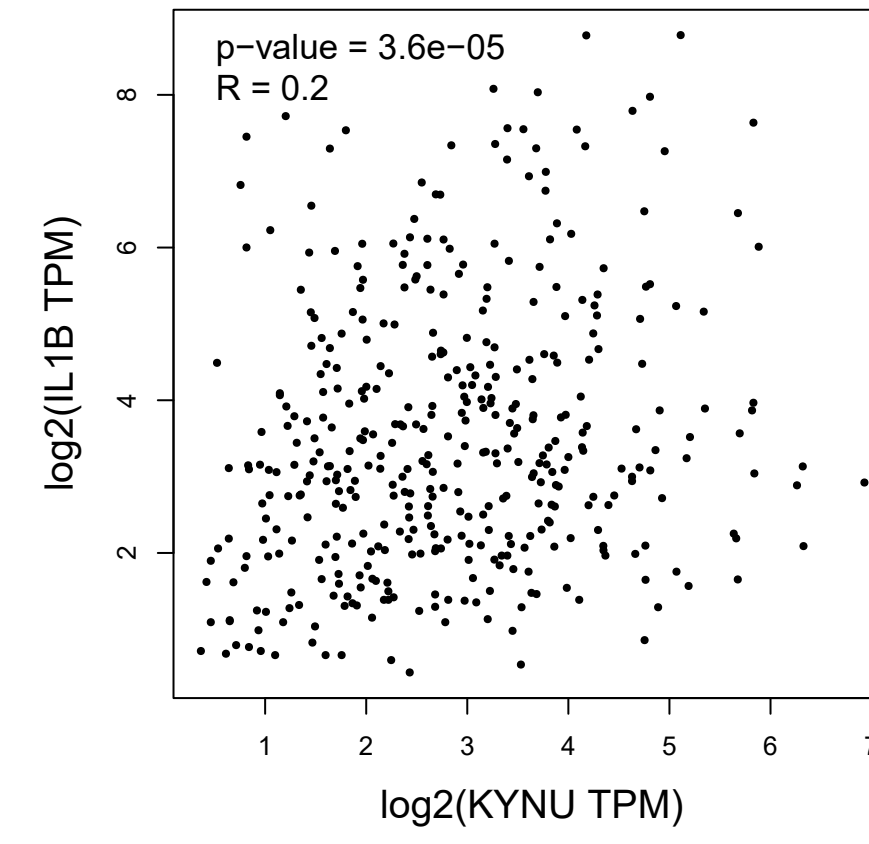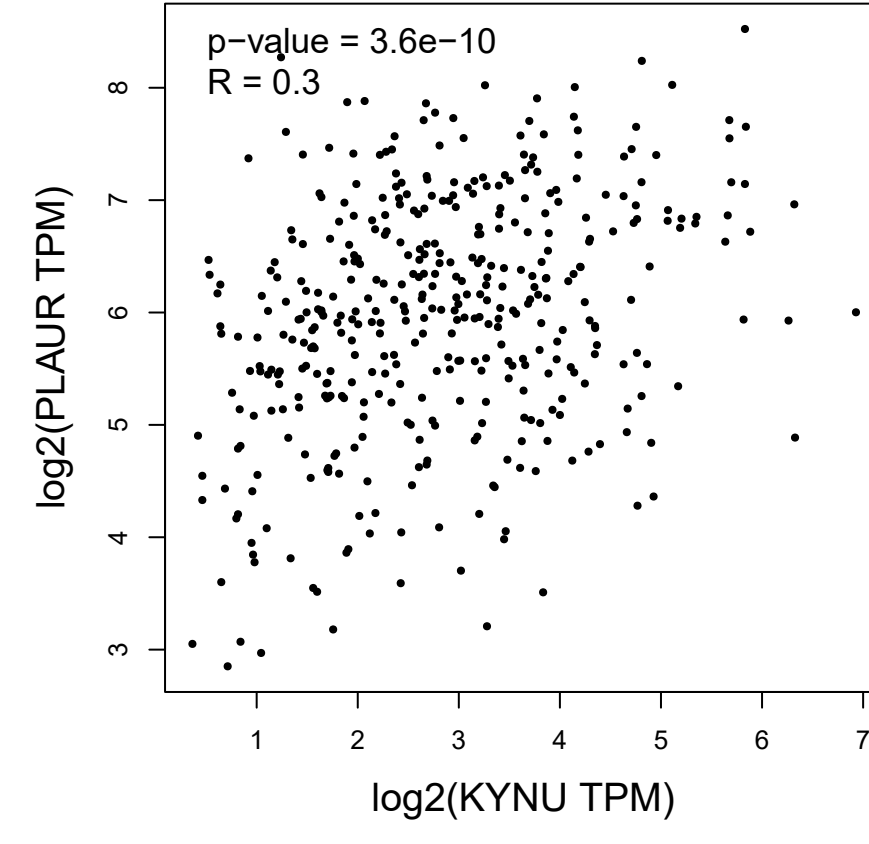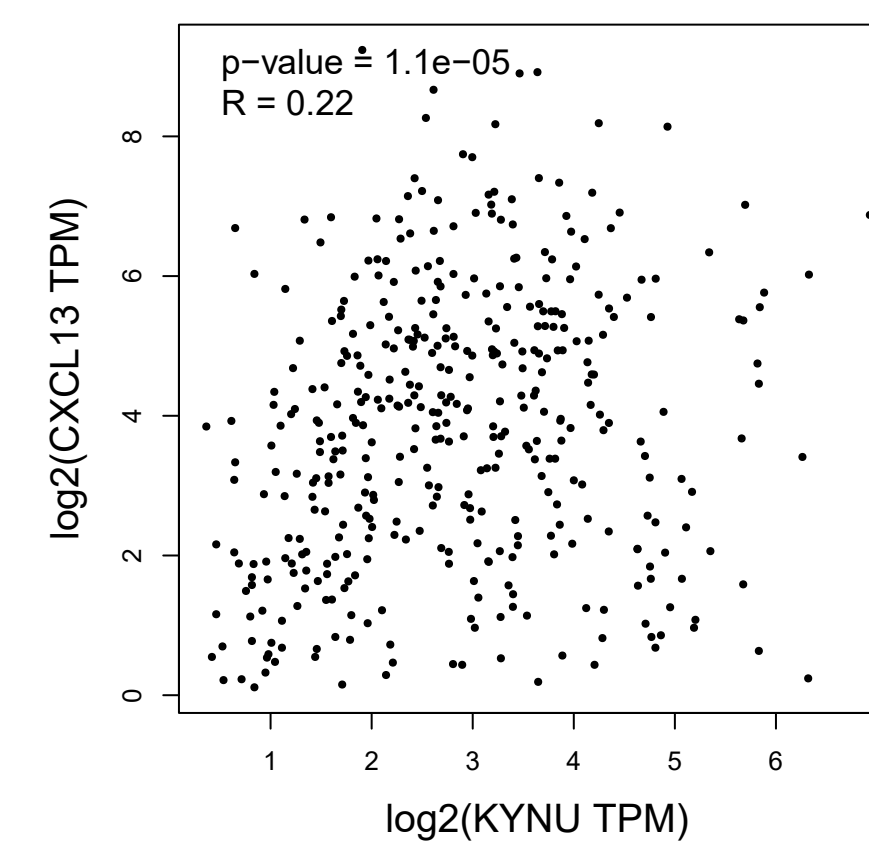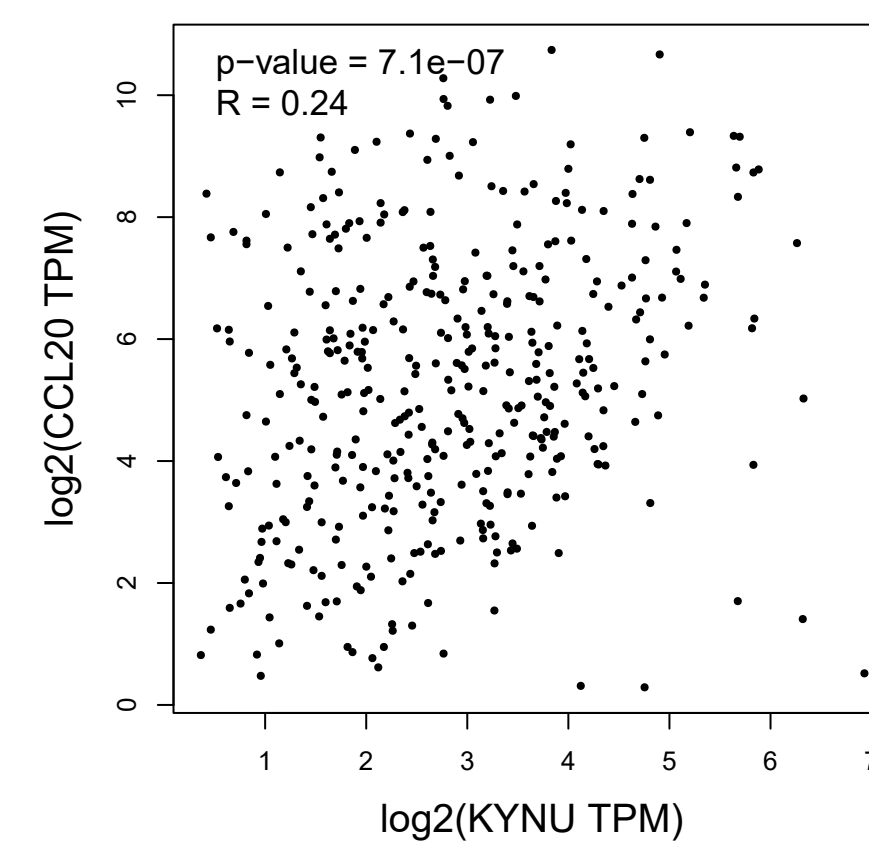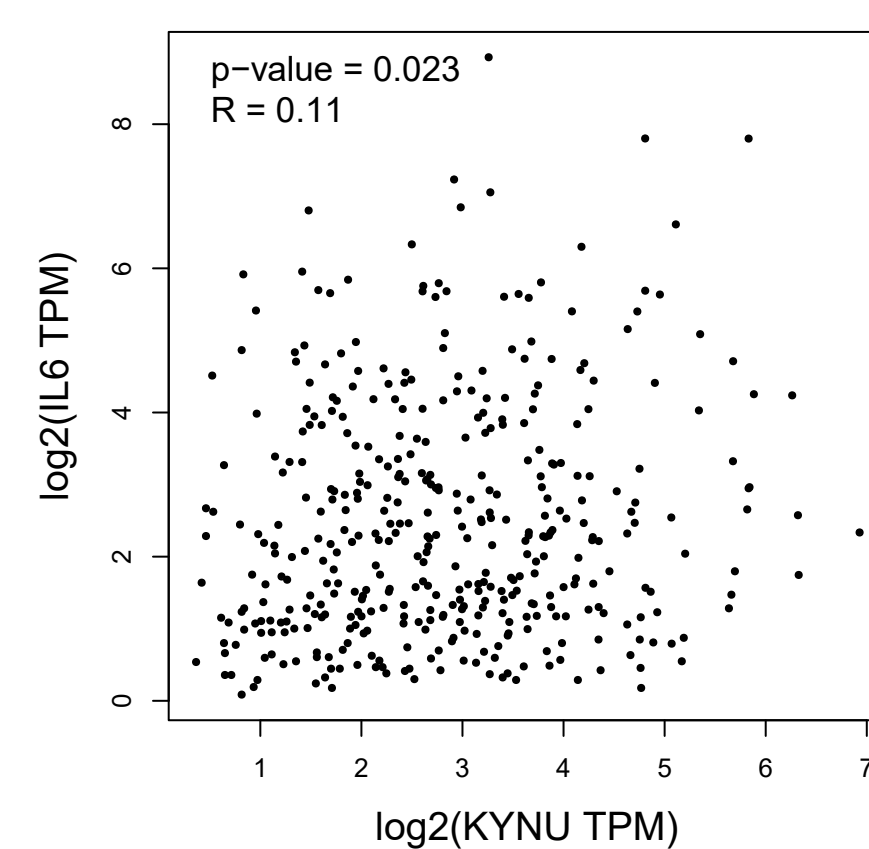

Supplement: f1 [file 4662480.f1.pdf]
