# Supplementary material for: KYNU as a Biomarker of Tumor-Associated Macrophages and Correlates with Immunosuppressive Microenvironment and Poor Prognosis in Gastric Cancer
Source: Hindawi journal article supplement (doi:10.1155/2023/4662480), 2023-11-02

**A**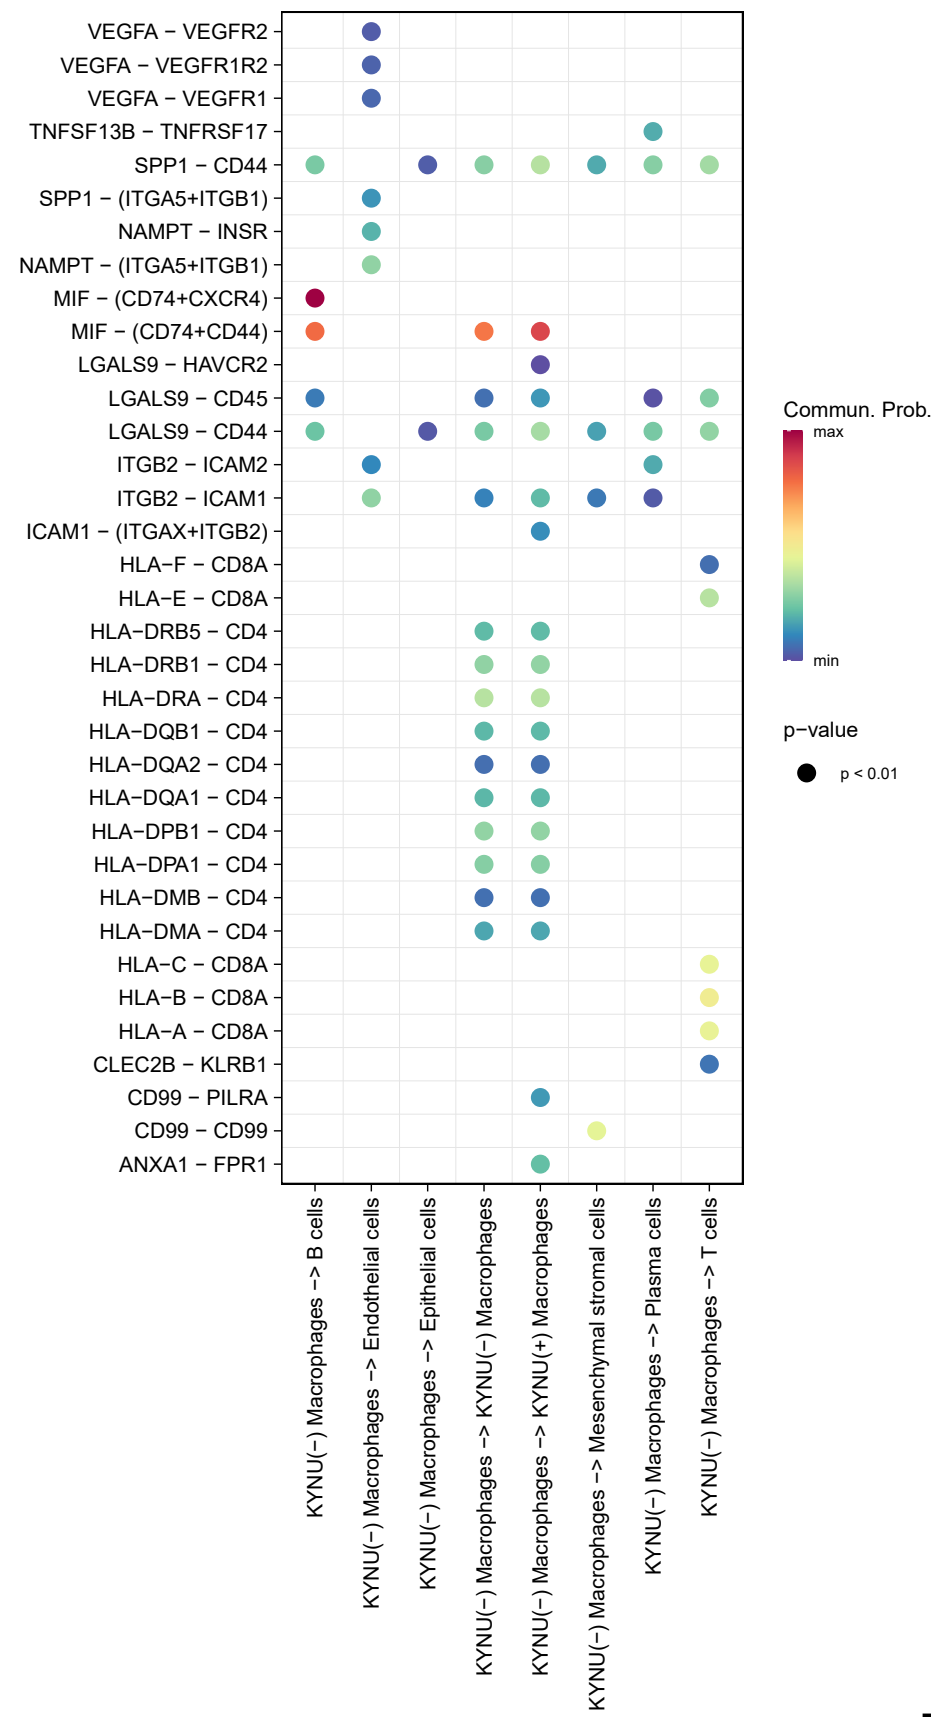**B**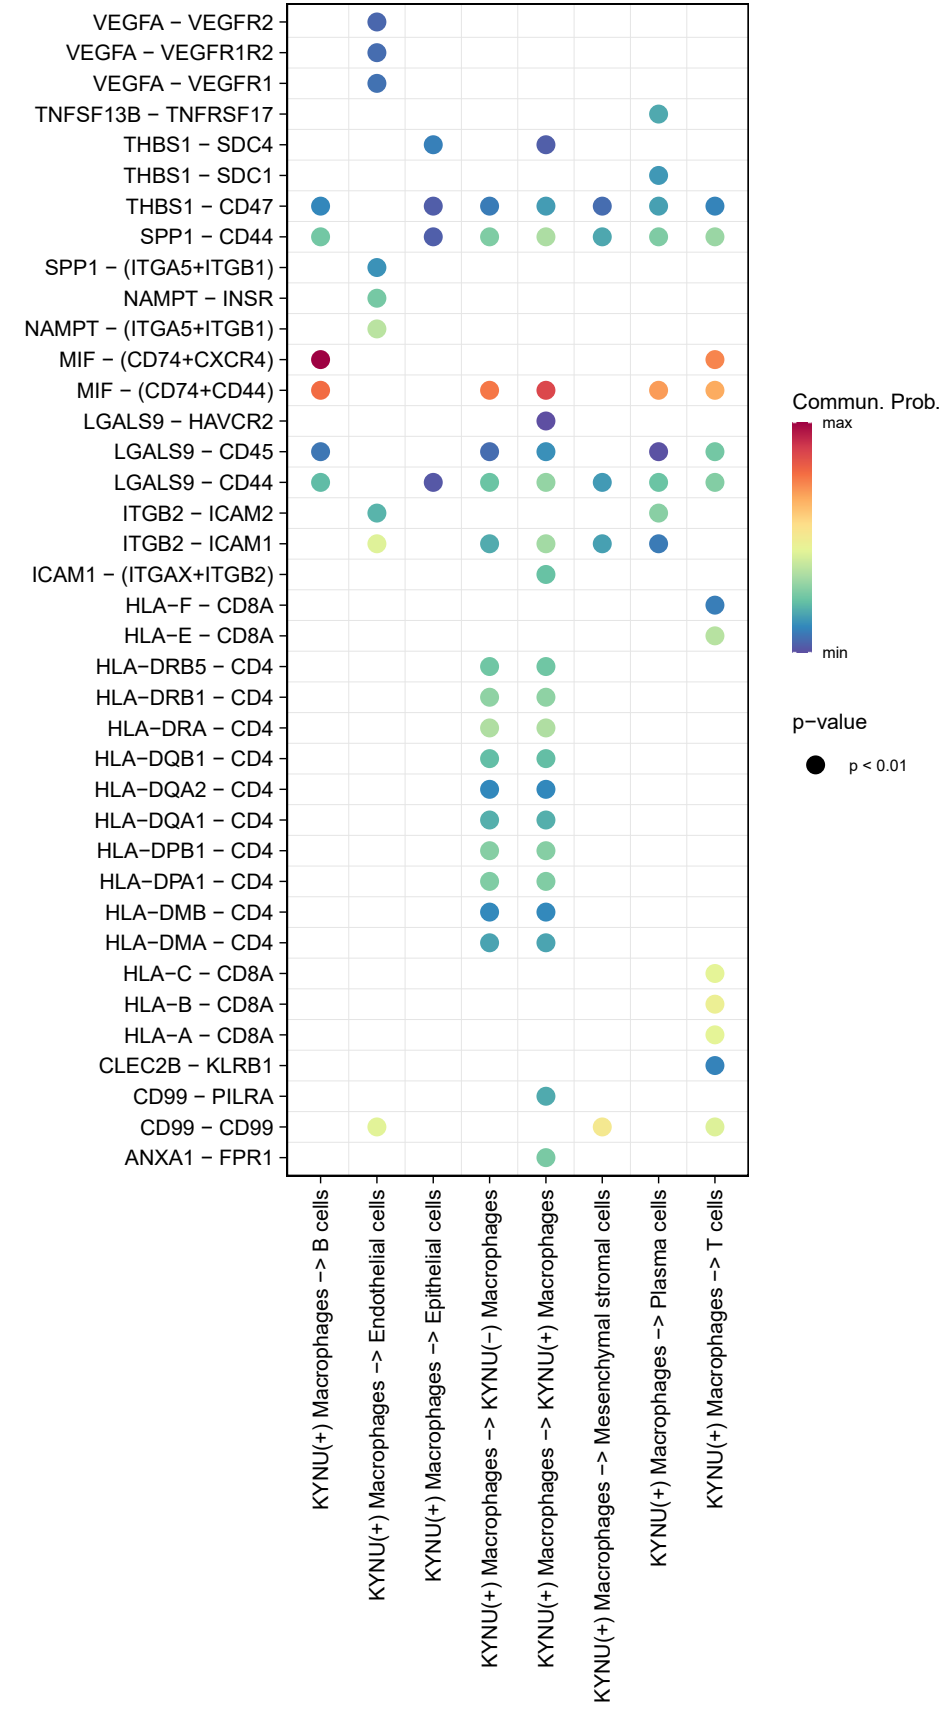**C**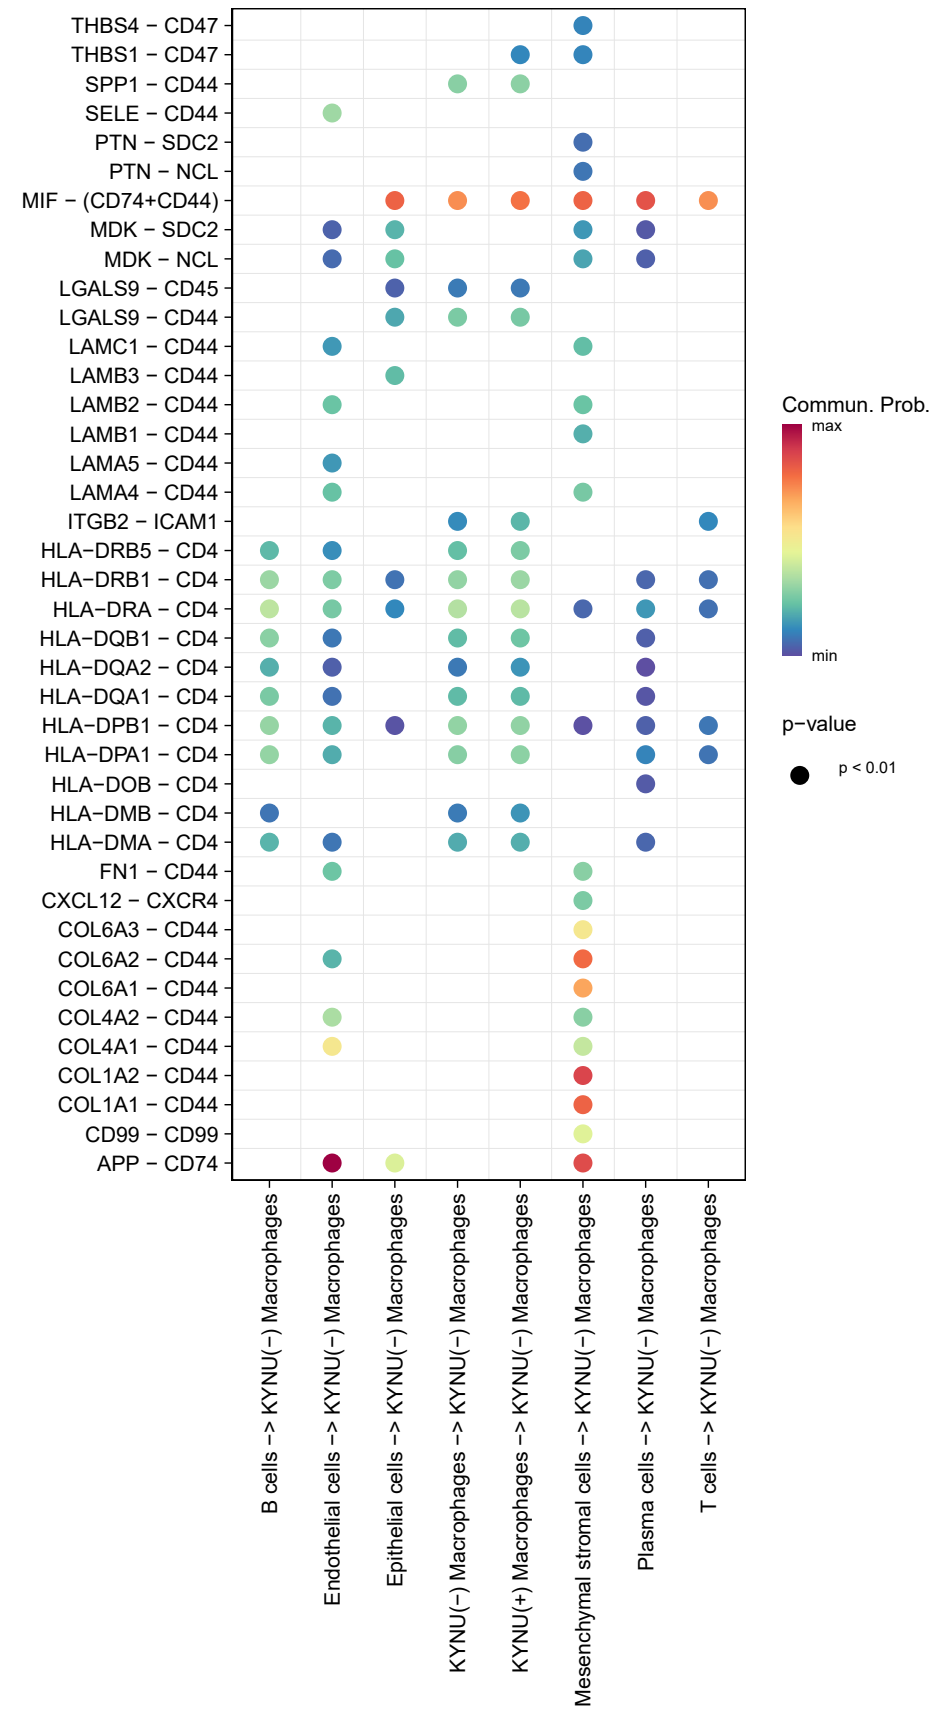**D**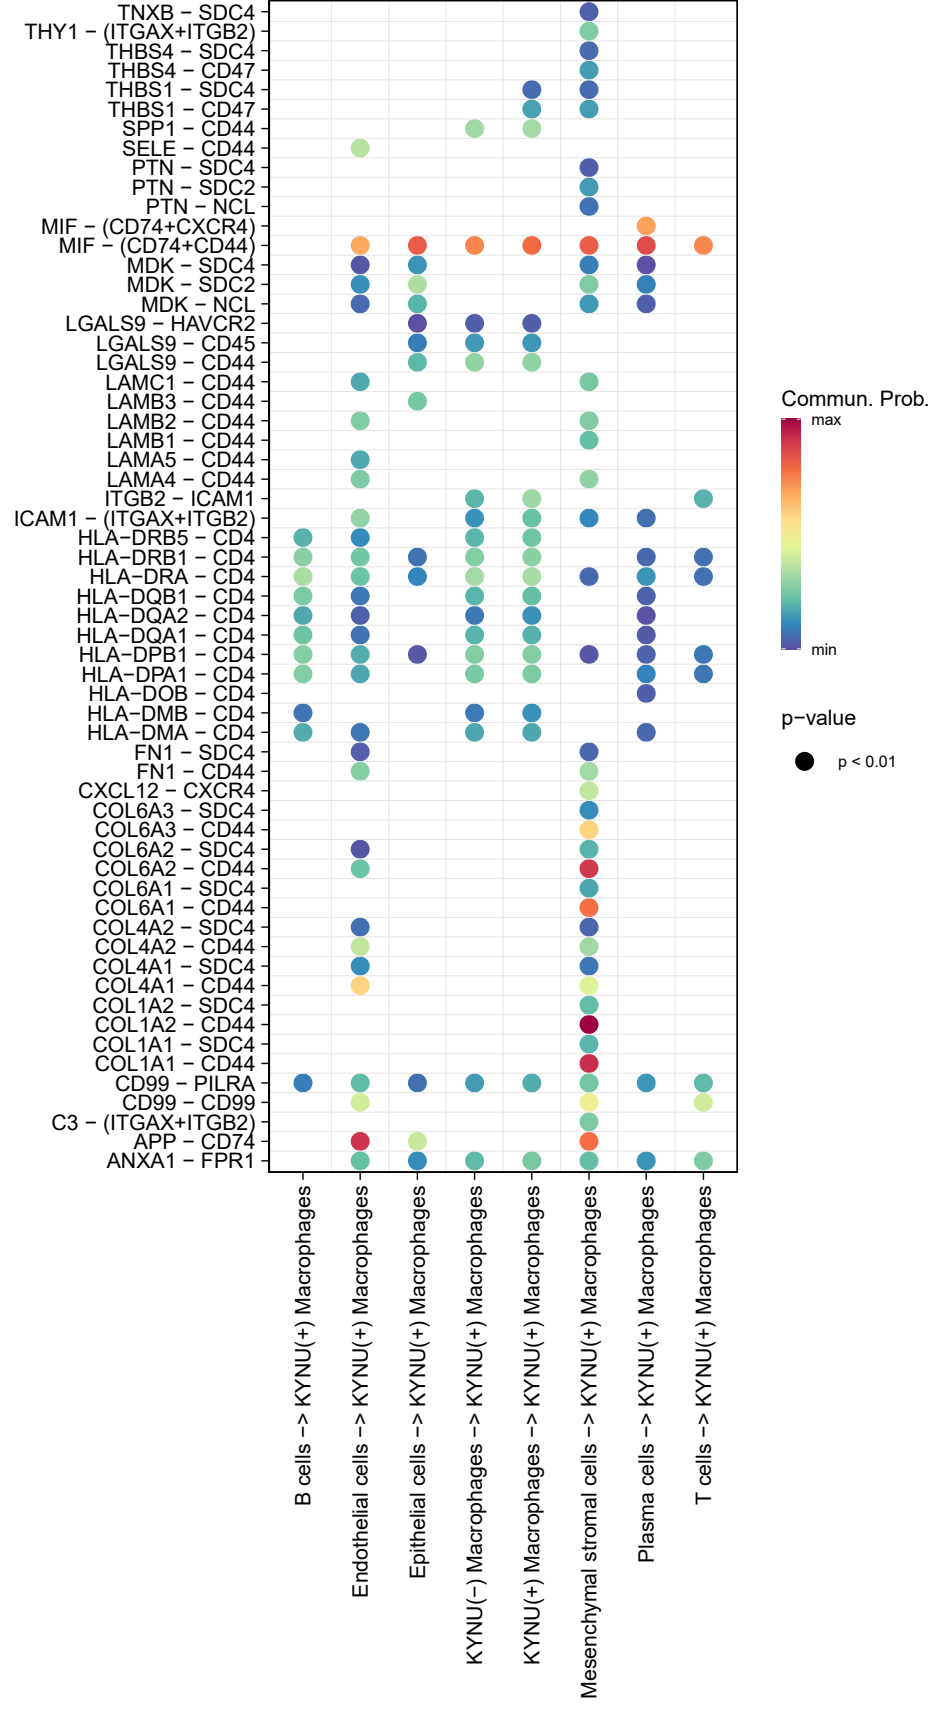

Supplement: f2 [file 4662480.f2.pdf]
