# Supplementary material for: KYNU as a Biomarker of Tumor-Associated Macrophages and Correlates with Immunosuppressive Microenvironment and Poor Prognosis in Gastric Cancer
Source: Hindawi journal article supplement (doi:10.1155/2023/4662480), 2023-11-02
Supplement: f3 [file 4662480.f3.pdf]

**Supplementary Table S1: KYNU expression and clinical characteristics in GC.**

| Characteristic   | Case(n)   | KYNU low (n = 159) | KYNU high (n = 158) | P value |
|------------------|-----------|--------------------|---------------------|---------|
| Age              | ≥65       | 94                 | 89                  | 0.615   |
|                  | <65       | 65                 | 69                  |         |
| Gender           | Female    | 68                 | 52                  | 0.070   |
|                  | Male      | 91                 | 106                 |         |
| Histologic Grade | G1        | 2                  | 5                   | 0.043   |
|                  | G2        | 64                 | 44                  |         |
|                  | G3        | 93                 | 109                 |         |
| TNM Stage        | Stage I   | 25                 | 17                  | 0.417   |
|                  | Stage II  | 53                 | 48                  |         |
|                  | Stage III | 66                 | 73                  |         |
|                  | Stage IV  | 15                 | 20                  |         |
| T stage          | T1        | 9                  | 6                   | 0.884   |
|                  | T2        | 31                 | 32                  |         |
|                  | T3        | 75                 | 77                  |         |
|                  | T4        | 44                 | 43                  |         |
| N stage          | N0        | 57                 | 42                  | 0.1339  |
|                  | N1        | 40                 | 43                  |         |
|                  | N2        | 36                 | 33                  |         |
|                  | N3        | 26                 | 40                  |         |
| M stage          | M0        | 150                | 145                 | 0.369   |
|                  | M1        | 9                  | 13                  |         |
