# Supplementary material for: KYNU as a Biomarker of Tumor-Associated Macrophages and Correlates with Immunosuppressive Microenvironment and Poor Prognosis in Gastric Cancer
Source: Hindawi journal article supplement (doi:10.1155/2023/4662480), 2023-11-02
Supplement: f4 [file 4662480.f4.pdf]

**Supplementary Table S2: Gene clusters expressed along the pseudotime trajectory**

| Gene       | Clusters |
|------------|----------|
| AP006222.2 | 1        |
| MRPL20     | 1        |
| NADK       | 1        |
| C1orf86    | 1        |
| RER1       | 1        |
| TNFRSF14   | 1        |
| MMEL1      | 1        |
| PGD        | 1        |
| PLOD1      | 1        |
| DHRS3      | 1        |
| TMEM51     | 1        |
| FHAD1      | 1        |
| SDHB       | 1        |
| IGSF21     | 1        |
| CAPZB      | 1        |
| MINOS1     | 1        |
| PLA2G2D    | 1        |
| DDOST      | 1        |
| LINC00339  | 1        |
| C1QA       | 1        |
| C1QC       | 1        |
| C1QB       | 1        |
| EPHB2      | 1        |
| HMGCL      | 1        |
| FUCA1      | 1        |
| MAN1C1     | 1        |
| ZNF593     | 1        |
| IFI6       | 1        |
| STX12      | 1        |
| ATPIF1     | 1        |
| PHACTR4    | 1        |
| SNHG12     | 1        |
| RAB42      | 1        |
| LAPTM5     | 1        |
| SDC3       | 1        |
| FABP3      | 1        |
| COL8A2     | 1        |
| LSM10      | 1        |
| ZC3H12A    | 1        |
| PABPC4     | 1        |
| CAP1       | 1        |
| PPT1       | 1        |
| ZMPSTE24   | 1        |
| PPCS       | 1        |
| PRDX1      | 1        |

|              |   |
|--------------|---|
| AKR1A1       | 1 |
| TMEM69       | 1 |
| PIK3R3       | 1 |
| MKNK1        | 1 |
| ELAVL4       | 1 |
| TXNDC12      | 1 |
| BTF3L4       | 1 |
| SCP2         | 1 |
| TMEM59       | 1 |
| JUN          | 1 |
| ATG4C        | 1 |
| TCTEX1D1     | 1 |
| WLS          | 1 |
| PIGK         | 1 |
| IFI44L       | 1 |
| CTBS         | 1 |
| 15-Sep       | 1 |
| LMO4         | 1 |
| GBP4         | 1 |
| ABCD3        | 1 |
| SORT1        | 1 |
| GSTM4        | 1 |
| LAMTOR5      | 1 |
| DRAM2        | 1 |
| ADORA3       | 1 |
| RAP1A        | 1 |
| OLFML3       | 1 |
| SIKE1        | 1 |
| PTGFRN       | 1 |
| REG4         | 1 |
| FCGR1B       | 1 |
| POLR3GL      | 1 |
| FCGR1A       | 1 |
| PLEKHO1      | 1 |
| APH1A        | 1 |
| C1orf54      | 1 |
| CTSS         | 1 |
| CTSK         | 1 |
| TNFAIP8L2    | 1 |
| TCHH         | 1 |
| S100A13      | 1 |
| SLC39A1      | 1 |
| JTB          | 1 |
| C1orf43      | 1 |
| RP11-350G8.5 | 1 |
| KRTCAP2      | 1 |
| GBA          | 1 |

|          |   |
|----------|---|
| FAM189B  | 1 |
| LAMTOR2  | 1 |
| SEMA4A   | 1 |
| SLC25A44 | 1 |
| C1orf85  | 1 |
| CD1B     | 1 |
| IFI16    | 1 |
| DUSP23   | 1 |
| SLAMF8   | 1 |
| NCSTN    | 1 |
| CD84     | 1 |
| ITLN1    | 1 |
| FCGR3A   | 1 |
| OLFML2B  | 1 |
| MGST3    | 1 |
| ALDH9A1  | 1 |
| TMCO1    | 1 |
| CREG1    | 1 |
| SFT2D2   | 1 |
| ATP1B1   | 1 |
| SOAT1    | 1 |
| IER5     | 1 |
| GLUL     | 1 |
| NPL      | 1 |
| RGL1     | 1 |
| RGS1     | 1 |
| GLRX2    | 1 |
| CFH      | 1 |
| TMEM9    | 1 |
| RNPEP    | 1 |
| ADIPOR1  | 1 |
| CYB5R1   | 1 |
| BTG2     | 1 |
| FAM72A   | 1 |
| IL10     | 1 |
| CR1      | 1 |
| CD46     | 1 |
| NENF     | 1 |
| ATF3     | 1 |
| NSL1     | 1 |
| CENPF    | 1 |
| RRP15    | 1 |
| AIDA     | 1 |
| TLR5     | 1 |
| EPHX1    | 1 |
| RAB4A    | 1 |
| ARV1     | 1 |

|            |   |
|------------|---|
| GNPAT      | 1 |
| NTPCR      | 1 |
| SCCPDH     | 1 |
| TMEM18     | 1 |
| ADI1       | 1 |
| PDIA6      | 1 |
| PQLC3      | 1 |
| LAPTM4A    | 1 |
| RHOB       | 1 |
| C2orf43    | 1 |
| FKBP1B     | 1 |
| DTNB       | 1 |
| SLC35F6    | 1 |
| ATRAID     | 1 |
| MPV17      | 1 |
| DPY30      | 1 |
| RASGRP3    | 1 |
| FEZ2       | 1 |
| GALM       | 1 |
| MORN2      | 1 |
| AC007246.3 | 1 |
| SLC8A1     | 1 |
| SRBD1      | 1 |
| PIGF       | 1 |
| MCFD2      | 1 |
| ACYP2      | 1 |
| MDH1       | 1 |
| CNRIP1     | 1 |
| ANTXR1     | 1 |
| ANXA4      | 1 |
| TEX261     | 1 |
| NAGK       | 1 |
| SPR        | 1 |
| STAMPB     | 1 |
| BOLA3      | 1 |
| LOXL3      | 1 |
| DOK1       | 1 |
| TGOLN2     | 1 |
| CAPG       | 1 |
| VAMP8      | 1 |
| TMEM150A   | 1 |
| CHMP3      | 1 |
| ANKRD36C   | 1 |
| DUSP2      | 1 |
| LMAN2L     | 1 |
| COX5B      | 1 |
| COA5       | 1 |

|            |   |
|------------|---|
| MGAT4A     | 1 |
| AC109826.1 | 1 |
| SULT1C2    | 1 |
| LINC00116  | 1 |
| MERTK      | 1 |
| TMEM87B    | 1 |
| TMEM37     | 1 |
| PTPN18     | 1 |
| MGAT5      | 1 |
| HNMT       | 1 |
| RND3       | 1 |
| FMNL2      | 1 |
| NR4A2      | 1 |
| CD302      | 1 |
| SSB        | 1 |
| METTL5     | 1 |
| CYBRD1     | 1 |
| GPR155     | 1 |
| DNAJC10    | 1 |
| SLC40A1    | 1 |
| OSGEPL1    | 1 |
| STAT1      | 1 |
| SLC39A10   | 1 |
| HSPE1      | 1 |
| PLCL1      | 1 |
| SPATS2L    | 1 |
| NDUFB3     | 1 |
| CD28       | 1 |
| IDH1       | 1 |
| RPE        | 1 |
| PNKD       | 1 |
| CYP27A1    | 1 |
| MFF        | 1 |
| PSMD1      | 1 |
| ARL4C      | 1 |
| BHLHE40    | 1 |
| CAMK1      | 1 |
| RPUSD3     | 1 |
| FGD5       | 1 |
| ZFYVE20    | 1 |
| UBE2E2     | 1 |
| SLC4A7     | 1 |
| CMC1       | 1 |
| TGFBR2     | 1 |
| GLB1       | 1 |
| CRTAP      | 1 |
| ITGA9      | 1 |

|               |   |
|---------------|---|
| ENTPD3-AS1    | 1 |
| SHISA5        | 1 |
| NDUFAF3       | 1 |
| KLHDC8B       | 1 |
| GPX1          | 1 |
| RHOA          | 1 |
| TCTA          | 1 |
| GNAI2         | 1 |
| TUSC2         | 1 |
| MAPKAPK3      | 1 |
| TEX264        | 1 |
| ABHD14A       | 1 |
| PPM1M         | 1 |
| NISCH         | 1 |
| STAB1         | 1 |
| SMIM4         | 1 |
| GLT8D1        | 1 |
| TMEM110       | 1 |
| CACNA2D3      | 1 |
| DNASE1L3      | 1 |
| SUCLG2        | 1 |
| CTD-2013N24.2 | 1 |
| ARL6IP5       | 1 |
| FRMD4B        | 1 |
| MITF          | 1 |
| MTRNR2L12     | 1 |
| NFKBIZ        | 1 |
| ALCAM         | 1 |
| ATP6V1A       | 1 |
| TIMMDC1       | 1 |
| ITGB5         | 1 |
| CHST13        | 1 |
| CHCHD6        | 1 |
| PLXND1        | 1 |
| ATP2C1        | 1 |
| NUDT16        | 1 |
| ANAPC13       | 1 |
| RP11-85F14.5  | 1 |
| MRAS          | 1 |
| RBP1          | 1 |
| HLTF          | 1 |
| SUCNR1        | 1 |
| SSR3          | 1 |
| TIPARP        | 1 |
| LXN           | 1 |
| RARRES1       | 1 |
| MFSD1         | 1 |

|              |   |
|--------------|---|
| SERPINI1     | 1 |
| GOLIM4       | 1 |
| GPR160       | 1 |
| NCEH1        | 1 |
| RP11-145M9.4 | 1 |
| GNB4         | 1 |
| DNAJC19      | 1 |
| PARL         | 1 |
| ABCC5        | 1 |
| ALG3         | 1 |
| ETV5         | 1 |
| ST6GAL1      | 1 |
| LEPREL1      | 1 |
| HES1         | 1 |
| AC069513.4   | 1 |
| TFRC         | 1 |
| MFSD7        | 1 |
| C4orf48      | 1 |
| RGS12        | 1 |
| LRPAP1       | 1 |
| CYTL1        | 1 |
| TBC1D14      | 1 |
| SLC2A9       | 1 |
| HS3ST1       | 1 |
| FAM200B      | 1 |
| QDPR         | 1 |
| LAP3         | 1 |
| SMIM20       | 1 |
| PGM2         | 1 |
| TBC1D1       | 1 |
| TLR1         | 1 |
| RBM47        | 1 |
| TMEM33       | 1 |
| OCIAD1       | 1 |
| SRD5A3       | 1 |
| PF4V1        | 1 |
| NAAA         | 1 |
| CXCL9        | 1 |
| CXCL10       | 1 |
| SCARB2       | 1 |
| LINC01094    | 1 |
| BMP2K        | 1 |
| RASGEF1B     | 1 |
| ENOPH1       | 1 |
| MRPS18C      | 1 |
| ABCG2        | 1 |
| SNCA         | 1 |

|               |   |
|---------------|---|
| CISD2         | 1 |
| SEC24B-AS1    | 1 |
| PLA2G12A      | 1 |
| KIAA1109      | 1 |
| RP13-884E18.2 | 1 |
| NDUFC1        | 1 |
| MGST2         | 1 |
| CTSO          | 1 |
| PDGFC         | 1 |
| FAM198B       | 1 |
| TMEM144       | 1 |
| 1-Mar         | 1 |
| RWDD4         | 1 |
| KIAA1430      | 1 |
| CYP4V2        | 1 |
| MIR4458HG     | 1 |
| CTNND2        | 1 |
| FAM105A       | 1 |
| ANKH          | 1 |
| FYB           | 1 |
| DAB2          | 1 |
| PTGER4        | 1 |
| SEPP1         | 1 |
| EMB           | 1 |
| NDUFS4        | 1 |
| NAIP          | 1 |
| FCHO2         | 1 |
| HEXB          | 1 |
| IQGAP2        | 1 |
| CRHBP         | 1 |
| AGGF1         | 1 |
| LHFPL2        | 1 |
| MTRNR2L2      | 1 |
| MEF2C         | 1 |
| RHOBTB3       | 1 |
| GLRX          | 1 |
| REEP5         | 1 |
| CCDC112       | 1 |
| DTWD2         | 1 |
| HSD17B4       | 1 |
| SNX2          | 1 |
| SNX24         | 1 |
| PPIC          | 1 |
| ACSL6         | 1 |
| UQCRQ         | 1 |
| TGFBI         | 1 |
| EGR1          | 1 |



|              |   |
|--------------|---|
| CD14         | 1 |
| GNPDA1       | 1 |
| NDFIP1       | 1 |
| ABLIM3       | 1 |
| CSF1R        | 1 |
| GPX3         | 1 |
| GM2A         | 1 |
| SLC36A1      | 1 |
| ATOX1        | 1 |
| LARP1        | 1 |
| HAVCR2       | 1 |
| TTC1         | 1 |
| NUDCD2       | 1 |
| DOCK2        | 1 |
| DUSP1        | 1 |
| RPL26L1      | 1 |
| ATP6V0E1     | 1 |
| LMAN2        | 1 |
| RGS14        | 1 |
| TMED9        | 1 |
| RUFY1        | 1 |
| CANX         | 1 |
| LTC4S        | 1 |
| RNF130       | 1 |
| MAPK9        | 1 |
| SERPINB6     | 1 |
| NQO2         | 1 |
| PXDC1        | 1 |
| F13A1        | 1 |
| LY86         | 1 |
| SSR1         | 1 |
| TMEM14C      | 1 |
| TMEM14B      | 1 |
| MCUR1        | 1 |
| CD83         | 1 |
| MYLIP        | 1 |
| TPMT         | 1 |
| C6orf62      | 1 |
| RP3-369A17.4 | 1 |
| HLA-E        | 1 |
| HLA-C        | 1 |
| AIF1         | 1 |
| HSPA1A       | 1 |
| HSPA1B       | 1 |
| NEU1         | 1 |
| C2           | 1 |
| HLA-DMB      | 1 |

|               |   |
|---------------|---|
| HLA-DMA       | 1 |
| HLA-DOA       | 1 |
| WDR46         | 1 |
| CUTA          | 1 |
| C6orf1        | 1 |
| NUDT3         | 1 |
| UHRF1BP1      | 1 |
| GLO1          | 1 |
| TREM2         | 1 |
| CUL9          | 1 |
| DNPH1         | 1 |
| YIPF3         | 1 |
| SLC29A1       | 1 |
| HSP90AB1      | 1 |
| NFKBIE        | 1 |
| RP11-444E17.6 | 1 |
| PLA2G7        | 1 |
| PAQR8         | 1 |
| GCLC          | 1 |
| DST           | 1 |
| SLC17A5       | 1 |
| ME1           | 1 |
| RRAGD         | 1 |
| PRDM1         | 1 |
| SEC63         | 1 |
| OSTM1         | 1 |
| SNX3          | 1 |
| CD164         | 1 |
| FIG4          | 1 |
| FAM26F        | 1 |
| RWDD1         | 1 |
| HDDC2         | 1 |
| HINT3         | 1 |
| ARHGAP18      | 1 |
| EPB41L2       | 1 |
| AKAP7         | 1 |
| STX7          | 1 |
| SLC18B1       | 1 |
| SGK1          | 1 |
| RP11-557H15.4 | 1 |
| IFNGR1        | 1 |
| CCDC28A       | 1 |
| ABRACL        | 1 |
| RP3-460G2.2   | 1 |
| GPR126        | 1 |
| AIG1          | 1 |
| FUCA2         | 1 |

|          |   |
|----------|---|
| PHACTR2  | 1 |
| UTRN     | 1 |
| RAB32    | 1 |
| SASH1    | 1 |
| PCMT1    | 1 |
| CCDC170  | 1 |
| GTF2H5   | 1 |
| TAGAP    | 1 |
| SLC22A1  | 1 |
| MPC1     | 1 |
| RNASET2  | 1 |
| FAM20C   | 1 |
| TTYH3    | 1 |
| KDEL2    | 1 |
| ZDHHC4   | 1 |
| NDUFA4   | 1 |
| TMEM106B | 1 |
| MACC1    | 1 |
| GPNMB    | 1 |
| FAM221A  | 1 |
| SKAP2    | 1 |
| HIBADH   | 1 |
| SCRN1    | 1 |
| EEPD1    | 1 |
| TMED4    | 1 |
| VOPP1    | 1 |
| GBAS     | 1 |
| GUSB     | 1 |
| LIMK1    | 1 |
| NCF1     | 1 |
| CCL24    | 1 |
| HSPB1    | 1 |
| FGL2     | 1 |
| CD36     | 1 |
| HGF      | 1 |
| TP53TG1  | 1 |
| FZD1     | 1 |
| AKAP9    | 1 |
| PON2     | 1 |
| BRI3     | 1 |
| LAMTOR4  | 1 |
| GAL3ST4  | 1 |
| AP1S1    | 1 |
| ZNHIT1   | 1 |
| RABL5    | 1 |
| ARMC10   | 1 |
| PSMC2    | 1 |

|               |   |
|---------------|---|
| GPR85         | 1 |
| LINC00998     | 1 |
| CPED1         | 1 |
| NDUFA5        | 1 |
| METTL2B       | 1 |
| CALU          | 1 |
| ATP6V1F       | 1 |
| RP11-38M8.1   | 1 |
| AKR1B1        | 1 |
| WDR91         | 1 |
| TBXAS1        | 1 |
| PARP12        | 1 |
| NDUFB2        | 1 |
| PDIA4         | 1 |
| ATP6V0E2      | 1 |
| LINC00996     | 1 |
| GIMAP8        | 1 |
| GIMAP4        | 1 |
| GIMAP1        | 1 |
| GIMAP5        | 1 |
| TMEM176B      | 1 |
| TMEM176A      | 1 |
| CDK5          | 1 |
| TMUB1         | 1 |
| RHEB          | 1 |
| DHRX          | 1 |
| ARSD          | 1 |
| RP11-733O18.1 | 1 |
| TLR7          | 1 |
| TLR8          | 1 |
| PIR           | 1 |
| MBTPS2        | 1 |
| PRDX4         | 1 |
| CYBB          | 1 |
| MID1IP1       | 1 |
| ATP6AP2       | 1 |
| GPR34         | 1 |
| GPR82         | 1 |
| VSIG4         | 1 |
| EDA           | 1 |
| COX7B         | 1 |
| ATP7A         | 1 |
| CYSLTR1       | 1 |
| SH3BGRL       | 1 |
| ARMCX1        | 1 |
| NGFRAP1       | 1 |
| TCEAL4        | 1 |

|               |   |
|---------------|---|
| TCEAL3        | 1 |
| TCEAL1        | 1 |
| PGRMC1        | 1 |
| TMEM255A      | 1 |
| LAMP2         | 1 |
| MCTS1         | 1 |
| AIFM1         | 1 |
| VMA21         | 1 |
| BCAP31        | 1 |
| SSR4          | 1 |
| ARHGAP4       | 1 |
| RENBP         | 1 |
| DNASE1L1      | 1 |
| ATP6AP1       | 1 |
| MPP1          | 1 |
| TMLHE         | 1 |
| CLN8          | 1 |
| CTSB          | 1 |
| MSR1          | 1 |
| ASAH1         | 1 |
| LPL           | 1 |
| GFRA2         | 1 |
| DOK2          | 1 |
| SORBS3        | 1 |
| ADAM28        | 1 |
| ADAMDEC1      | 1 |
| DPYSL2        | 1 |
| LEPROTL1      | 1 |
| RP11-11N9.4   | 1 |
| EIF4EBP1      | 1 |
| HTRA4         | 1 |
| ADAM9         | 1 |
| SMIM19        | 1 |
| GGH           | 1 |
| DNAJC5B       | 1 |
| TRAM1         | 1 |
| TMEM70        | 1 |
| LY96          | 1 |
| FABP5         | 1 |
| ATP6V0D2      | 1 |
| WWP1          | 1 |
| CPQ           | 1 |
| MTDH          | 1 |
| COX6C         | 1 |
| ENPP2         | 1 |
| RP11-489O18.1 | 1 |
| SLC45A4       | 1 |

|               |   |
|---------------|---|
| ARC           | 1 |
| LY6E          | 1 |
| SLC52A2       | 1 |
| TONSL         | 1 |
| PPAPDC2       | 1 |
| BNC2          | 1 |
| PTPLAD2       | 1 |
| IFT74         | 1 |
| ACO1          | 1 |
| NDUFB6        | 1 |
| CD72          | 1 |
| CCDC107       | 1 |
| HINT2         | 1 |
| CLTA          | 1 |
| FXN           | 1 |
| ZFAND5        | 1 |
| ALDH1A1       | 1 |
| DAPK1         | 1 |
| CKS2          | 1 |
| GADD45G       | 1 |
| NFIL3         | 1 |
| FAM120A       | 1 |
| SLC35D2       | 1 |
| AAED1         | 1 |
| TRIM14        | 1 |
| CORO2A        | 1 |
| GNG10         | 1 |
| SLC31A2       | 1 |
| SLC31A1       | 1 |
| STOM          | 1 |
| NDUFA8        | 1 |
| PTGS1         | 1 |
| NEK6          | 1 |
| SLC2A8        | 1 |
| ENG           | 1 |
| AK1           | 1 |
| DPM2          | 1 |
| RP11-545E17.3 | 1 |
| CCBL1         | 1 |
| DOLK          | 1 |
| PPP2R4        | 1 |
| DPP7          | 1 |
| ZMYND11       | 1 |
| KLF6          | 1 |
| RP11-536K7.3  | 1 |
| SFMBT2        | 1 |
| PHYH          | 1 |

|               |   |
|---------------|---|
| FRMD4A        | 1 |
| MRC1L1        | 1 |
| SLC39A12      | 1 |
| MSRB2         | 1 |
| OTUD1         | 1 |
| ACBD5         | 1 |
| WAC-AS1       | 1 |
| RP11-472N13.3 | 1 |
| ARHGAP12      | 1 |
| NRP1          | 1 |
| ZNF32         | 1 |
| CXCL12        | 1 |
| NCOA4         | 1 |
| RP11-556E13.1 | 1 |
| CISD1         | 1 |
| TMEM26        | 1 |
| EGR2          | 1 |
| SGPL1         | 1 |
| PCBD1         | 1 |
| UNC5B         | 1 |
| SLC29A3       | 1 |
| C10orf54      | 1 |
| PSAP          | 1 |
| MYOZ1         | 1 |
| PLAU          | 1 |
| COMTD1        | 1 |
| C10orf11      | 1 |
| KCNMA1        | 1 |
| TMEM254       | 1 |
| FAM213A       | 1 |
| LIPA          | 1 |
| FFAR4         | 1 |
| BLNK          | 1 |
| HPS1          | 1 |
| PKD2L1        | 1 |
| SCD           | 1 |
| FAM178A       | 1 |
| C10orf76      | 1 |
| USMG5         | 1 |
| CACUL1        | 1 |
| SFXN4         | 1 |
| RGS10         | 1 |
| HTRA1         | 1 |
| MKI67         | 1 |
| MGMT          | 1 |
| FUOM          | 1 |
| IFITM3        | 1 |

|          |   |
|----------|---|
| CD151    | 1 |
| TSPAN4   | 1 |
| CHID1    | 1 |
| AP2A2    | 1 |
| IFITM10  | 1 |
| CTSD     | 1 |
| ASCL2    | 1 |
| CD81     | 1 |
| SLC22A18 | 1 |
| STIM1    | 1 |
| TPP1     | 1 |
| PPFIBP2  | 1 |
| TMEM9B   | 1 |
| ADM      | 1 |
| LYVE1    | 1 |
| PLEKHA7  | 1 |
| NUCB2    | 1 |
| TMEM86A  | 1 |
| CD59     | 1 |
| LMO2     | 1 |
| APIP     | 1 |
| HSD17B12 | 1 |
| EXT2     | 1 |
| CKAP5    | 1 |
| ACP2     | 1 |
| NR1H3    | 1 |
| SPI1     | 1 |
| MTCH2    | 1 |
| UBE2L6   | 1 |
| SERPING1 | 1 |
| CTNND1   | 1 |
| MPEG1    | 1 |
| MS4A6A   | 1 |
| MS4A4A   | 1 |
| MS4A7    | 1 |
| MS4A14   | 1 |
| CYB561A3 | 1 |
| TMEM138  | 1 |
| RAB3IL1  | 1 |
| B3GAT3   | 1 |
| C11orf83 | 1 |
| TMEM179B | 1 |
| ATL3     | 1 |
| RTN3     | 1 |
| MARK2    | 1 |
| COX8A    | 1 |
| VEGFB    | 1 |



|               |   |
|---------------|---|
| PRDX5         | 1 |
| BATF2         | 1 |
| ARL2          | 1 |
| CCDC85B       | 1 |
| YIF1A         | 1 |
| ZDHHC24       | 1 |
| CTSF          | 1 |
| ADRBK1        | 1 |
| POLD4         | 1 |
| TMEM134       | 1 |
| NDUFV1        | 1 |
| UNC93B1       | 1 |
| ALDH3B1       | 1 |
| CCND1         | 1 |
| LAMTOR1       | 1 |
| FOLR2         | 1 |
| INPPL1        | 1 |
| SLCO2B1       | 1 |
| TPBGL         | 1 |
| ARRB1         | 1 |
| ACER3         | 1 |
| NDUFC2        | 1 |
| ALG8          | 1 |
| TMEM126A      | 1 |
| CTSC          | 1 |
| ALKBH8        | 1 |
| ACAT1         | 1 |
| SDHD          | 1 |
| IL18          | 1 |
| PTS           | 1 |
| CADM1         | 1 |
| USP2          | 1 |
| ROBO3         | 1 |
| SLC37A2       | 1 |
| TMEM218       | 1 |
| RP11-480C22.1 | 1 |
| ST14          | 1 |
| NINJ2         | 1 |
| C12orf5       | 1 |
| DYRK4         | 1 |
| CD9           | 1 |
| LTBR          | 1 |
| TAPBPL        | 1 |
| PTMS          | 1 |
| CD4           | 1 |
| LPCAT3        | 1 |
| CD163L1       | 1 |

|           |   |
|-----------|---|
| CD163     | 1 |
| C3AR1     | 1 |
| M6PR      | 1 |
| A2M       | 1 |
| CLEC2B    | 1 |
| CREBL2    | 1 |
| HEBP1     | 1 |
| PLBD1     | 1 |
| H2AFJ     | 1 |
| DERA      | 1 |
| CMAS      | 1 |
| ITPR2     | 1 |
| TM7SF3    | 1 |
| ZCRB1     | 1 |
| SLC48A1   | 1 |
| TMBIM6    | 1 |
| COX14     | 1 |
| METTL7A   | 1 |
| NR4A1     | 1 |
| ITGB7     | 1 |
| SMUG1     | 1 |
| BLOC1S1   | 1 |
| ESYT1     | 1 |
| CNPY2     | 1 |
| LRP1      | 1 |
| PIP4K2C   | 1 |
| OS9       | 1 |
| TSPAN31   | 1 |
| FAM19A2   | 1 |
| GNS       | 1 |
| TMEM19    | 1 |
| PLXNC1    | 1 |
| IKBIP     | 1 |
| ARL1      | 1 |
| CHPT1     | 1 |
| GNPTAB    | 1 |
| CCDC53    | 1 |
| IGF1      | 1 |
| HSP90B1   | 1 |
| APPL2     | 1 |
| CMKLR1    | 1 |
| USP30-AS1 | 1 |
| ANAPC7    | 1 |
| VPS29     | 1 |
| HVCN1     | 1 |
| TMEM116   | 1 |
| OAS1      | 1 |

|               |   |
|---------------|---|
| TPCN1         | 1 |
| PLBD2         | 1 |
| SDS           | 1 |
| SDSL          | 1 |
| MLEC          | 1 |
| SCARB1        | 1 |
| CRYL1         | 1 |
| N6AMT2        | 1 |
| MRP63         | 1 |
| MTIF3         | 1 |
| SLC46A3       | 1 |
| ALOX5AP       | 1 |
| ALG5          | 1 |
| NHLRC3        | 1 |
| LACC1         | 1 |
| TSC22D1       | 1 |
| NUDT15        | 1 |
| ITM2B         | 1 |
| RB1           | 1 |
| LPAR6         | 1 |
| SETDB2        | 1 |
| ARL11         | 1 |
| KCTD12        | 1 |
| RAP2A         | 1 |
| FARP1         | 1 |
| TM9SF2        | 1 |
| TNFSF13B      | 1 |
| RAB20         | 1 |
| LAMP1         | 1 |
| TMEM255B      | 1 |
| RNASE6        | 1 |
| RNASE1        | 1 |
| DAD1          | 1 |
| SLC7A7        | 1 |
| LRP10         | 1 |
| SLC7A8        | 1 |
| DHRS4         | 1 |
| DHRS4L2       | 1 |
| PCK2          | 1 |
| GMPR2         | 1 |
| SPTSSA        | 1 |
| SNX6          | 1 |
| RP11-547D23.1 | 1 |
| LGALS3        | 1 |
| EXOC5         | 1 |
| JKAMP         | 1 |
| RTN1          | 1 |

|                |   |
|----------------|---|
| SLC38A6        | 1 |
| SGPP1          | 1 |
| MAX            | 1 |
| PIGH           | 1 |
| VTI1B          | 1 |
| RDH11          | 1 |
| SYNJ2BP        | 1 |
| ABCD4          | 1 |
| NPC2           | 1 |
| TMED10         | 1 |
| FOS            | 1 |
| ANGEL1         | 1 |
| C14orf159      | 1 |
| LGMN           | 1 |
| ITPK1          | 1 |
| IFI27          | 1 |
| IFI27L2        | 1 |
| EVL            | 1 |
| DEGS2          | 1 |
| APOPT1         | 1 |
| NUDT14         | 1 |
| CYFIP1         | 1 |
| RP11-1008C21.1 | 1 |
| SPRED1         | 1 |
| PLCB2          | 1 |
| RMDN3          | 1 |
| GCHFR          | 1 |
| SERF2          | 1 |
| CASC4          | 1 |
| B2M            | 1 |
| TRIM69         | 1 |
| GATM           | 1 |
| GALK2          | 1 |
| CCPG1          | 1 |
| MNS1           | 1 |
| TCF12          | 1 |
| TPM1           | 1 |
| HERC1          | 1 |
| FAM96A         | 1 |
| PPIB           | 1 |
| SPG21          | 1 |
| MTFMT          | 1 |
| CLN6           | 1 |
| UACA           | 1 |
| THAP10         | 1 |
| HEXA           | 1 |
| CD276          | 1 |

|              |   |
|--------------|---|
| CSK          | 1 |
| ULK3         | 1 |
| SCAMP2       | 1 |
| COMMD4       | 1 |
| TSPAN3       | 1 |
| TBC1D2B      | 1 |
| CTSH         | 1 |
| TM6SF1       | 1 |
| C15orf38     | 1 |
| MEF2A        | 1 |
| FAM195A      | 1 |
| FAM173A      | 1 |
| HAGHL        | 1 |
| CLCN7        | 1 |
| HAGH         | 1 |
| NDUFB10      | 1 |
| PGP          | 1 |
| AMDHD2       | 1 |
| TCEB2        | 1 |
| HCFC1R1      | 1 |
| MMP25        | 1 |
| NMRAL1       | 1 |
| CPPED1       | 1 |
| NTAN1        | 1 |
| GDE1         | 1 |
| KNOP1        | 1 |
| ACSM5        | 1 |
| IGSF6        | 1 |
| OTOA         | 1 |
| EEF2K        | 1 |
| HS3ST2       | 1 |
| NDUFAB1      | 1 |
| NUPR1        | 1 |
| SULT1A1      | 1 |
| QPRT         | 1 |
| TMEM219      | 1 |
| PYCARD       | 1 |
| RP11-452L6.7 | 1 |
| HEATR3       | 1 |
| ADCY7        | 1 |
| LPCAT2       | 1 |
| AMFR         | 1 |
| MT1G         | 1 |
| MT1H         | 1 |
| CETP         | 1 |
| COQ9         | 1 |
| GOT2         | 1 |

|          |   |
|----------|---|
| TK2      | 1 |
| CMTM3    | 1 |
| TMEM208  | 1 |
| AGRP     | 1 |
| DPEP3    | 1 |
| DPEP2    | 1 |
| PLA2G15  | 1 |
| MAF      | 1 |
| GCSH     | 1 |
| HSBP1    | 1 |
| IRF8     | 1 |
| CYBA     | 1 |
| TRAPPC2L | 1 |
| RILP     | 1 |
| CLUH     | 1 |
| CTNS     | 1 |
| CXCL16   | 1 |
| VMO1     | 1 |
| SCIMP    | 1 |
| TXNDC17  | 1 |
| XAF1     | 1 |
| RNASEK   | 1 |
| CTDNEP1  | 1 |
| TNFSF12  | 1 |
| CD68     | 1 |
| STX8     | 1 |
| GAS7     | 1 |
| SCO1     | 1 |
| TRPV2    | 1 |
| PLD6     | 1 |
| PEMT     | 1 |
| SLC47A1  | 1 |
| ALDH3A2  | 1 |
| WSB1     | 1 |
| SLC46A1  | 1 |
| ADAP2    | 1 |
| RNF135   | 1 |
| EVI2A    | 1 |
| COPRS    | 1 |
| CCL8     | 1 |
| CCL13    | 1 |
| CCL18    | 1 |
| CCL3L1   | 1 |
| CCL4L2   | 1 |
| CISD3    | 1 |
| PLXDC1   | 1 |
| STARD3   | 1 |

|              |   |
|--------------|---|
| GSDMA        | 1 |
| IGFBP4       | 1 |
| RAB5C        | 1 |
| ATP6V0A1     | 1 |
| NAGLU        | 1 |
| MLX          | 1 |
| COA3         | 1 |
| IFI35        | 1 |
| VAT1         | 1 |
| G6PC3        | 1 |
| GRN          | 1 |
| COPZ2        | 1 |
| GNGT2        | 1 |
| ABI3         | 1 |
| PDK2         | 1 |
| MRPL27       | 1 |
| ACSF2        | 1 |
| SPATA20      | 1 |
| ABCC3        | 1 |
| SCPEP1       | 1 |
| CLTC         | 1 |
| VMP1         | 1 |
| RP11-178C3.2 | 1 |
| MRC2         | 1 |
| ACE          | 1 |
| CCDC47       | 1 |
| MILR1        | 1 |
| FAM20A       | 1 |
| SSTR2        | 1 |
| CD300A       | 1 |
| CD300LF      | 1 |
| ATP5H        | 1 |
| GRB2         | 1 |
| TRIM47       | 1 |
| METTL23      | 1 |
| SOCS3        | 1 |
| TIMP2        | 1 |
| LGALS3BP     | 1 |
| GAA          | 1 |
| EIF4A3       | 1 |
| RNF213       | 1 |
| BAIAP2       | 1 |
| MRPL12       | 1 |
| P4HB         | 1 |
| SECTM1       | 1 |
| COLEC12      | 1 |
| RP11-838N2.4 | 1 |

|              |   |
|--------------|---|
| RP11-760N9.1 | 1 |
| OSBPL1A      | 1 |
| DSC2         | 1 |
| ACAA2        | 1 |
| MRO          | 1 |
| ME2          | 1 |
| ELAC1        | 1 |
| WDR7         | 1 |
| NARS         | 1 |
| SEC11C       | 1 |
| KDSR         | 1 |
| TIMM21       | 1 |
| CNDP2        | 1 |
| CSNK2A1      | 1 |
| FAM110A      | 1 |
| DDRGK1       | 1 |
| C20orf194    | 1 |
| SIGLEC1      | 1 |
| LAMP5        | 1 |
| ESF1         | 1 |
| SNX5         | 1 |
| MGME1        | 1 |
| LINC00493    | 1 |
| NAA20        | 1 |
| ABHD12       | 1 |
| EDEM2        | 1 |
| C20orf24     | 1 |
| NDRG3        | 1 |
| SAMHD1       | 1 |
| RPN2         | 1 |
| PIGT         | 1 |
| CTSA         | 1 |
| PLTP         | 1 |
| MMP9         | 1 |
| SLC12A5      | 1 |
| FAM210B      | 1 |
| GNAS         | 1 |
| CTSZ         | 1 |
| BIRC7        | 1 |
| RGS19        | 1 |
| BSG          | 1 |
| CFD          | 1 |
| MIDN         | 1 |
| C19orf24     | 1 |
| NDUFS7       | 1 |
| REEP6        | 1 |
| UQCR11.1     | 1 |



|               |   |
|---------------|---|
| TIMM13        | 1 |
| GADD45B       | 1 |
| SLC39A3       | 1 |
| NCLN          | 1 |
| NFIC          | 1 |
| MFSD12        | 1 |
| C19orf10      | 1 |
| CLEC4G        | 1 |
| CD209         | 1 |
| CTD-2369P2.2  | 1 |
| FDX1L         | 1 |
| ILF3-AS1      | 1 |
| ACP5          | 1 |
| MAN2B1        | 1 |
| DNASE2        | 1 |
| CALR          | 1 |
| STX10         | 1 |
| IER2          | 1 |
| CC2D1A        | 1 |
| GIPC1         | 1 |
| DNAJB1        | 1 |
| TECR          | 1 |
| NDUFB7        | 1 |
| WIZ           | 1 |
| KLF2          | 1 |
| SMIM7         | 1 |
| MRPL34        | 1 |
| BST2          | 1 |
| COLGALT1      | 1 |
| JUND          | 1 |
| GDF15         | 1 |
| LRRC25        | 1 |
| C19orf60      | 1 |
| ATP13A1       | 1 |
| CEBPA         | 1 |
| PEPD          | 1 |
| USF2          | 1 |
| TMEM147       | 1 |
| COX6B1        | 1 |
| IGFLR1        | 1 |
| TYROBP        | 1 |
| ZNF566        | 1 |
| CTD-2162K18.5 | 1 |
| C19orf33      | 1 |
| YIF1B         | 1 |
| RINL          | 1 |
| FCGBP         | 1 |

|                 |   |
|-----------------|---|
| PLD3            | 1 |
| BLVRB           | 1 |
| AXL             | 1 |
| AC006129.4      | 1 |
| RABAC1          | 1 |
| ETHE1           | 1 |
| APOE            | 1 |
| APOC1           | 1 |
| APOC2           | 1 |
| ERCC2           | 1 |
| FOSB            | 1 |
| PPM1N           | 1 |
| CALM3           | 1 |
| AP2S1           | 1 |
| TMEM160         | 1 |
| SAE1            | 1 |
| SEPW1           | 1 |
| KDELRL1         | 1 |
| CA11            | 1 |
| HSD17B14        | 1 |
| NUCB1           | 1 |
| DHDH            | 1 |
| FTL             | 1 |
| FCGRT           | 1 |
| EMC10           | 1 |
| CLEC11A         | 1 |
| SIGLEC7         | 1 |
| CD33            | 1 |
| SIGLEC10        | 1 |
| SIGLEC8         | 1 |
| SIGLEC12        | 1 |
| FPR3            | 1 |
| ZNF331          | 1 |
| NDUFA3          | 1 |
| TFPT            | 1 |
| CTD-2337J16.1   | 1 |
| LILRB5          | 1 |
| LAIR1           | 1 |
| LILRB4          | 1 |
| EPN1            | 1 |
| CECR1           | 1 |
| COMT            | 1 |
| DGCR6L          | 1 |
| SNAP29          | 1 |
| XXbac-B135H6.15 | 1 |
| TPST2           | 1 |
| CRYBB1          | 1 |

|          |   |
|----------|---|
| AP1B1    | 1 |
| UQCR10   | 1 |
| TCN2     | 1 |
| PIK3IP1  | 1 |
| YWHAH    | 1 |
| APOL6    | 1 |
| FOXRED2  | 1 |
| NCF4     | 1 |
| CYTH4    | 1 |
| CDC42EP1 | 1 |
| MAFF     | 1 |
| RPS19BP1 | 1 |
| NAGA     | 1 |
| NFAM1    | 1 |
| TLL12    | 1 |
| PARVB    | 1 |
| PRR5     | 1 |
| KIAA0930 | 1 |
| TTC38    | 1 |
| CRELD2   | 1 |
| ARSA     | 1 |
| ATP5J    | 1 |
| IFNAR2   | 1 |
| RCAN1    | 1 |
| CBR1     | 1 |
| PIGP     | 1 |
| PSMG1    | 1 |
| MX1      | 1 |
| NDUFV3   | 1 |
| SIK1     | 1 |
| C21orf33 | 1 |
| PTTG1IP  | 1 |
| ITGB2    | 1 |
| COL6A1   | 1 |
| COL6A2   | 1 |
| MT-ND2   | 1 |
| MT-CO2   | 1 |
| MT-ATP6  | 1 |
| MT-CO3   | 1 |
| MT-ND3   | 1 |
| MT-ND4   | 1 |
| MT-CYB   | 1 |
| ISG15    | 2 |
| MXRA8    | 2 |
| MMP23B   | 2 |
| ERRFI1   | 2 |
| TNFRSF8  | 2 |

|              |   |
|--------------|---|
| TNFRSF1B     | 2 |
| ZBTB17       | 2 |
| CDA          | 2 |
| CLIC4        | 2 |
| C1orf63      | 2 |
| TMEM50A      | 2 |
| FGR          | 2 |
| TXLNA        | 2 |
| C1orf122     | 2 |
| MTF1         | 2 |
| MFSD2A       | 2 |
| SSBP3        | 2 |
| PPAP2B       | 2 |
| JAK1         | 2 |
| AK4          | 2 |
| TMED5        | 2 |
| F3           | 2 |
| RP11-284N8.3 | 2 |
| CHI3L2       | 2 |
| ZNF697       | 2 |
| NOTCH2       | 2 |
| NBPF9        | 2 |
| PDE4DIP      | 2 |
| NBPF10       | 2 |
| RP11-277L2.5 | 2 |
| MCL1         | 2 |
| S100A9       | 2 |
| S100A12      | 2 |
| S100A8       | 2 |
| RAB13        | 2 |
| IL6R         | 2 |
| ETV3L        | 2 |
| SLAMF9       | 2 |
| SLAMF1       | 2 |
| CD48         | 2 |
| FCER1G       | 2 |
| FCGR2B       | 2 |
| FCRLB        | 2 |
| MPZL1        | 2 |
| SELE         | 2 |
| QSOX1        | 2 |
| NCF2         | 2 |
| IVNS1ABP     | 2 |
| PTGS2        | 2 |
| PTPN7        | 2 |
| PPP1R15B     | 2 |
| IL24         | 2 |

|               |   |
|---------------|---|
| LAMB3         | 2 |
| RP1-28O10.1   | 2 |
| G0S2          | 2 |
| SLC30A1       | 2 |
| RP11-400N13.3 | 2 |
| WDR26         | 2 |
| GUK1          | 2 |
| KMO           | 2 |
| FOSL2         | 2 |
| CRIM1         | 2 |
| QPCT          | 2 |
| CDC42EP3      | 2 |
| CYP1B1        | 2 |
| RHOQ          | 2 |
| RAB1A         | 2 |
| PLEK          | 2 |
| MXD1          | 2 |
| HK2           | 2 |
| GNLY          | 2 |
| IL1R1         | 2 |
| IL1RL2        | 2 |
| LIMS1         | 2 |
| SOWAHC        | 2 |
| IL1A          | 2 |
| IL1B          | 2 |
| IL36G         | 2 |
| IL1RN         | 2 |
| MARCO         | 2 |
| RAB3GAP1      | 2 |
| KYNU          | 2 |
| ZEB2          | 2 |
| TNFAIP6       | 2 |
| ACVR1         | 2 |
| TANK          | 2 |
| AC093818.1    | 2 |
| MLTK          | 2 |
| SESTD1        | 2 |
| NAB1          | 2 |
| NABP1         | 2 |
| HSPD1         | 2 |
| BZW1          | 2 |
| RP11-469M7.1  | 2 |
| TNS1          | 2 |
| SLC11A1       | 2 |
| ACSL3         | 2 |
| CCL20         | 2 |
| PID1          | 2 |

|           |   |
|-----------|---|
| DNER      | 2 |
| D2HGDH    | 2 |
| NEU4      | 2 |
| ARL8B     | 2 |
| IRAK2     | 2 |
| SLC6A6    | 2 |
| SH3BP5    | 2 |
| EAF1      | 2 |
| UBE2E1    | 2 |
| EIF1B     | 2 |
| CTNNB1    | 2 |
| CDCP1     | 2 |
| TMEM158   | 2 |
| CCR5      | 2 |
| CCRL2     | 2 |
| RYBP      | 2 |
| PPP4R2    | 2 |
| GBE1      | 2 |
| CGGBP1    | 2 |
| PIK3CB    | 2 |
| ZBTB38    | 2 |
| GK5       | 2 |
| PLSCR1    | 2 |
| TM4SF1    | 2 |
| PTX3      | 2 |
| TNIK      | 2 |
| PLD1      | 2 |
| PP13439   | 2 |
| FNDC3B    | 2 |
| ATP11B    | 2 |
| B3GNT5    | 2 |
| BCL6      | 2 |
| IL1RAP    | 2 |
| ATP13A3   | 2 |
| LINC00884 | 2 |
| ZDHHC19   | 2 |
| TCTEX1D2  | 2 |
| TM4SF19.1 | 2 |
| LRCH3     | 2 |
| N4BP2     | 2 |
| RHOH      | 2 |
| CHIC2     | 2 |
| IL8       | 2 |
| CXCL1     | 2 |
| PPBP      | 2 |
| CXCL5     | 2 |
| CXCL3     | 2 |

|               |   |
|---------------|---|
| CXCL2         | 2 |
| EREG          | 2 |
| AREG          | 2 |
| CXCL11        | 2 |
| PRDM8         | 2 |
| HPSE          | 2 |
| SPP1          | 2 |
| SLC39A8       | 2 |
| NFKB1         | 2 |
| C4orf3        | 2 |
| TNIP3         | 2 |
| ANXA5         | 2 |
| SLC7A11       | 2 |
| TLR2          | 2 |
| RAPGEF2       | 2 |
| DDX60L        | 2 |
| ACSL1         | 2 |
| RP11-701P16.5 | 2 |
| RP11-462G22.1 | 2 |
| LPCAT1        | 2 |
| MYO10         | 2 |
| BASP1         | 2 |
| ELOVL7        | 2 |
| ZFYVE16       | 2 |
| VCAN          | 2 |
| MEF2C-AS1     | 2 |
| LUCAT1        | 2 |
| ELL2          | 2 |
| PRR16         | 2 |
| SEC24A        | 2 |
| CYSTM1        | 2 |
| HBEGF         | 2 |
| SPINK1        | 2 |
| TNIP1         | 2 |
| CTB-114C7.4   | 2 |
| STK10         | 2 |
| UBTD2         | 2 |
| ERGIC1        | 2 |
| PDLIM7        | 2 |
| DOK3          | 2 |
| HIVEP1        | 2 |
| EDN1          | 2 |
| PHACTR1       | 2 |
| TBC1D7        | 2 |
| RNF144B       | 2 |
| HIST1H1C      | 2 |
| PPP1R11       | 2 |

|               |   |
|---------------|---|
| IER3          | 2 |
| BRPF3         | 2 |
| TREM1         | 2 |
| VEGFA         | 2 |
| C6orf223      | 2 |
| NT5E          | 2 |
| AKIRIN2       | 2 |
| PNRC1         | 2 |
| SLC16A10      | 2 |
| RP11-367G18.1 | 2 |
| MARCKS        | 2 |
| DSE           | 2 |
| RP1-93H18.7   | 2 |
| RP3-325F22.5  | 2 |
| HIVEP2        | 2 |
| TAB2          | 2 |
| SOD2          | 2 |
| WTAP          | 2 |
| RP1-249F5.3   | 2 |
| MAP3K4        | 2 |
| PHF10         | 2 |
| DLL1          | 2 |
| AC147651.4    | 2 |
| ZFAND2A       | 2 |
| GNA12         | 2 |
| TWISTNB       | 2 |
| CTA-293F17.1  | 2 |
| ITGB8         | 2 |
| IL6           | 2 |
| PPP1R17       | 2 |
| INHBA         | 2 |
| PURB          | 2 |
| HUS1          | 2 |
| UPP1          | 2 |
| SEC61G        | 2 |
| RABGEF1       | 2 |
| PTPN12        | 2 |
| AC002456.2    | 2 |
| PILRA         | 2 |
| MUC17         | 2 |
| SERPINE1      | 2 |
| NAMPT         | 2 |
| DOCK4         | 2 |
| ZNF277        | 2 |
| MET           | 2 |
| HILPDA        | 2 |
| STRIP2        | 2 |



|                |   |
|----------------|---|
| MIR29A         | 2 |
| LINC-PINT      | 2 |
| KDM7A          | 2 |
| JHDM1D-AS1     | 2 |
| MGAM           | 2 |
| CLEC5A         | 2 |
| AC093673.5     | 2 |
| PRKAG2         | 2 |
| INSIG1         | 2 |
| PLCXD1         | 2 |
| IL3RA          | 2 |
| CD99           | 2 |
| GS1-600G8.5    | 2 |
| SMS            | 2 |
| SAT1           | 2 |
| GK             | 2 |
| RPGR           | 2 |
| TIMP1          | 2 |
| HUWE1          | 2 |
| IL2RG          | 2 |
| PGK1           | 2 |
| ACSL4          | 2 |
| MST4           | 2 |
| RAP2C          | 2 |
| MAMLD1         | 2 |
| IRAK1          | 2 |
| TKTL1          | 2 |
| FLNA           | 2 |
| DEFB1          | 2 |
| RP11-1080G15.1 | 2 |
| EGR3           | 2 |
| SLC25A37       | 2 |
| BNIP3L         | 2 |
| AGPAT6         | 2 |
| SDCBP          | 2 |
| NSMAF          | 2 |
| MSC            | 2 |
| HEY1           | 2 |
| PAG1           | 2 |
| RIPK2          | 2 |
| NBN            | 2 |
| SDC2           | 2 |
| KB-1507C5.4    | 2 |
| ASAP1          | 2 |
| NDRG1          | 2 |
| RP11-629O1.2   | 2 |
| GRINA          | 2 |

|               |   |
|---------------|---|
| CTD-3065J16.6 | 2 |
| CD274         | 2 |
| MOB3B         | 2 |
| B4GALT1       | 2 |
| UBAP2         | 2 |
| CTSL          | 2 |
| S1PR3         | 2 |
| NINJ1         | 2 |
| MSANTD3       | 2 |
| SLC44A1       | 2 |
| TNFSF15       | 2 |
| TNFSF8        | 2 |
| HSPA5         | 2 |
| FAM129B       | 2 |
| SLC2A6        | 2 |
| OPTN          | 2 |
| ITGB1         | 2 |
| CSGALNACT2    | 2 |
| HNRNPF        | 2 |
| SGMS1         | 2 |
| RP11-120C12.3 | 2 |
| HERC4         | 2 |
| SRGN          | 2 |
| SAR1A         | 2 |
| P4HA1         | 2 |
| ZMIZ1-AS1     | 2 |
| PPIF          | 2 |
| LIPN          | 2 |
| PIK3AP1       | 2 |
| ENTPD7        | 2 |
| GSTO1         | 2 |
| ITPRIP        | 2 |
| BBIP1         | 2 |
| ACSL5         | 2 |
| BNIP3         | 2 |
| MIR210HG      | 2 |
| PHLDA2        | 2 |
| NRIP3         | 2 |
| DENND5A       | 2 |
| CD44          | 2 |
| FTH1          | 2 |
| EHD1          | 2 |
| SERPINH1      | 2 |
| SLC36A4       | 2 |
| MMP10         | 2 |
| MMP1          | 2 |
| CASP4         | 2 |

|               |   |
|---------------|---|
| CASP1         | 2 |
| CARD16        | 2 |
| RDX           | 2 |
| TBCEL         | 2 |
| GAPDH         | 2 |
| TPI1          | 2 |
| SLC2A3        | 2 |
| CLEC4D        | 2 |
| CLEC4E        | 2 |
| RP11-20D14.6  | 2 |
| AC091814.2    | 2 |
| CLEC12A       | 2 |
| EMP1          | 2 |
| BCAT1         | 2 |
| RP11-662I13.2 | 2 |
| DAZAP2        | 2 |
| GPR84         | 2 |
| ITGA5         | 2 |
| MUCL1         | 2 |
| MMP19         | 2 |
| IL23A         | 2 |
| MON2          | 2 |
| TBK1          | 2 |
| IRAK3         | 2 |
| PHLDA1        | 2 |
| OSBPL8        | 2 |
| DUSP6         | 2 |
| ATP2B1        | 2 |
| LINC00936     | 2 |
| C12orf79      | 2 |
| BTG1          | 2 |
| RP11-796E2.4  | 2 |
| CRADD         | 2 |
| DRAM1         | 2 |
| CKAP4         | 2 |
| MED13L        | 2 |
| WSB2          | 2 |
| OASL          | 2 |
| HCAR2         | 2 |
| RILPL2        | 2 |
| RP11-955H22.1 | 2 |
| GJB2          | 2 |
| SPATA13       | 2 |
| USP12         | 2 |
| FLT1          | 2 |
| CCNA1         | 2 |
| RGCC          | 2 |

|               |   |
|---------------|---|
| LINC01050     | 2 |
| LCP1          | 2 |
| FNDC3A        | 2 |
| FAM124A       | 2 |
| IRG1          | 2 |
| DNAJC3        | 2 |
| PNP           | 2 |
| RN7SL1        | 2 |
| C14orf182     | 2 |
| GNG2          | 2 |
| PTGER2        | 2 |
| ERO1L         | 2 |
| RP11-841O20.2 | 2 |
| GCH1          | 2 |
| RP11-349A22.5 | 2 |
| PRKCH         | 2 |
| RP11-47I22.2  | 2 |
| HIF1A         | 2 |
| HIF1A-AS2     | 2 |
| SNAPC1        | 2 |
| ACTN1         | 2 |
| RP4-647C14.3  | 2 |
| NUMB          | 2 |
| RIN3          | 2 |
| SERPINA1      | 2 |
| HSP90AA1      | 2 |
| TDRD9         | 2 |
| SCG5          | 2 |
| C15orf48      | 2 |
| RP11-519G16.3 | 2 |
| AQP9          | 2 |
| RAB8B         | 2 |
| CA12          | 2 |
| MAP2K1        | 2 |
| MTHFS         | 2 |
| ST20          | 2 |
| BCL2A1        | 2 |
| ABHD17C       | 2 |
| KIAA1199      | 2 |
| MESDC1        | 2 |
| RHCG          | 2 |
| ANPEP         | 2 |
| IQGAP1        | 2 |
| ARRDC4        | 2 |
| LITAF         | 2 |
| DCUN1D3       | 2 |
| METTL9        | 2 |

|               |   |
|---------------|---|
| ALDOA         | 2 |
| PPP4C         | 2 |
| ZNF646        | 2 |
| ITGAX         | 2 |
| ZNF720        | 2 |
| CES1          | 2 |
| MT2A          | 2 |
| MT1F          | 2 |
| GPR97         | 2 |
| KIFC3         | 2 |
| HP            | 2 |
| DNAAF1        | 2 |
| SLC43A2       | 2 |
| MIR22HG       | 2 |
| CHRNE         | 2 |
| MED31         | 2 |
| HS3ST3B1      | 2 |
| MAP2K3        | 2 |
| SDF2          | 2 |
| SEZ6          | 2 |
| CPD           | 2 |
| CCL2          | 2 |
| CCL23         | 2 |
| CCL3          | 2 |
| CCL4          | 2 |
| CCL3L3        | 2 |
| CCL4L1        | 2 |
| CTB-58E17.1   | 2 |
| CSF3          | 2 |
| UBE2Z         | 2 |
| KAT7          | 2 |
| MED13         | 2 |
| CD300E        | 2 |
| H3F3B         | 2 |
| SPHK1         | 2 |
| RP11-806H10.4 | 2 |
| DNAH17        | 2 |
| CYTH1         | 2 |
| C1QTNF1       | 2 |
| AC144831.1    | 2 |
| DLGAP1-AS1    | 2 |
| EPB41L3       | 2 |
| PSTPIP2       | 2 |
| RP11-15F12.1  | 2 |
| SERPINB2      | 2 |
| SERPINB8      | 2 |
| SMOX          | 2 |

|               |   |
|---------------|---|
| RP4-779E11.3  | 2 |
| CD93          | 2 |
| MAP1LC3A      | 2 |
| SRC           | 2 |
| SDC4          | 2 |
| B4GALT5       | 2 |
| RP11-290F20.3 | 2 |
| SLCO4A1       | 2 |
| LINC00659     | 2 |
| DOT1L         | 2 |
| SEMA6B        | 2 |
| TNFSF14       | 2 |
| STXBP2        | 2 |
| RETN          | 2 |
| C19orf59      | 2 |
| ANGPTL4       | 2 |
| ZSWIM4        | 2 |
| EMR3          | 2 |
| EMR2          | 2 |
| MAP1S         | 2 |
| FFAR2         | 2 |
| HCST          | 2 |
| NFKBIB        | 2 |
| IRGQ          | 2 |
| PLAUR         | 2 |
| MEIS3         | 2 |
| EMP3          | 2 |
| SIGLEC14      | 2 |
| HAS1          | 2 |
| FPR2          | 2 |
| OSCAR         | 2 |
| LILRA2        | 2 |
| FCAR          | 2 |
| CTB-61M7.2    | 2 |
| ZNF787        | 2 |
| MIF           | 2 |
| GGT5          | 2 |
| XBP1          | 2 |
| LIMK2         | 2 |
| TOM1          | 2 |
| RAC2          | 2 |
| APOBEC3B      | 2 |
| MEI1          | 2 |
| ARFGAP3       | 2 |
| AF165138.7    | 2 |
| NRIP1         | 2 |
| BTG3          | 2 |

|               |   |
|---------------|---|
| MIR155HG      | 2 |
| MAP3K7CL      | 2 |
| BACH1         | 2 |
| ETS2          | 2 |
| CSTB          | 2 |
| RRP1          | 2 |
| TNFRSF18      | 3 |
| ENO1          | 3 |
| GPR157        | 3 |
| ECE1          | 3 |
| MARCKSL1      | 3 |
| SFPQ          | 3 |
| SLC2A1        | 3 |
| GADD45A       | 3 |
| DNTTIP2       | 3 |
| CD58          | 3 |
| MTMR11        | 3 |
| S100A10       | 3 |
| RPS27         | 3 |
| ARHGEF2       | 3 |
| TAGLN2        | 3 |
| UAP1          | 3 |
| LAD1          | 3 |
| CD55          | 3 |
| H3F3A         | 3 |
| RP11-295G20.2 | 3 |
| LYST          | 3 |
| ADSS          | 3 |
| NLRP3         | 3 |
| ID2           | 3 |
| VRK2          | 3 |
| LINC00152     | 3 |
| MAP4K4        | 3 |
| MIR4435-1HG   | 3 |
| AC017002.1    | 3 |
| CYTIP         | 3 |
| LY75          | 3 |
| SP3           | 3 |
| CFLAR         | 3 |
| ACKR3         | 3 |
| RAMP1         | 3 |
| ANKRD28       | 3 |
| LRRFIP2       | 3 |
| OXSRI         | 3 |
| SELK          | 3 |
| PROK2         | 3 |
| LINC00877     | 3 |

|          |   |
|----------|---|
| CD200    | 3 |
| POGLUT1  | 3 |
| CSTA     | 3 |
| MSL2     | 3 |
| ATP1B3   | 3 |
| CHST2    | 3 |
| SIAH2    | 3 |
| SKIL     | 3 |
| LAMP3    | 3 |
| IGF2BP2  | 3 |
| MFI2     | 3 |
| RPL35A   | 3 |
| TNIP2    | 3 |
| LIMCH1   | 3 |
| GRSF1    | 3 |
| ANTXR2   | 3 |
| PLAC8    | 3 |
| DAPP1    | 3 |
| PPP3CA   | 3 |
| TET2     | 3 |
| SGMS2    | 3 |
| MED10    | 3 |
| SUB1     | 3 |
| IL7R     | 3 |
| GPBP1    | 3 |
| MAST4    | 3 |
| STARD4   | 3 |
| TNFAIP8  | 3 |
| LMNB1    | 3 |
| PPP2CA   | 3 |
| TAF7     | 3 |
| NR3C1    | 3 |
| SLC26A2  | 3 |
| ANXA6    | 3 |
| ADAM19   | 3 |
| EBF1     | 3 |
| RNF145   | 3 |
| IRF4     | 3 |
| SERPINB1 | 3 |
| SERPINB9 | 3 |
| JARID2   | 3 |
| HLA-DOB  | 3 |
| KCTD20   | 3 |
| CDKN1A   | 3 |
| EEF1A1   | 3 |
| FSCN1    | 3 |
| TSPAN13  | 3 |



|            |   |
|------------|---|
| TRA2A      | 3 |
| HOTAIRM1   | 3 |
| MYO1G      | 3 |
| TPST1      | 3 |
| AC003092.1 | 3 |
| ACHE       | 3 |
| HIPK2      | 3 |
| BRAF       | 3 |
| AP1S2      | 3 |
| SYAP1      | 3 |
| ACOT9      | 3 |
| CHST7      | 3 |
| SYN1       | 3 |
| CFP        | 3 |
| UXT        | 3 |
| PLP2       | 3 |
| HNRNPH2    | 3 |
| EMD        | 3 |
| RPL10      | 3 |
| CLU        | 3 |
| DUSP4      | 3 |
| IDO1       | 3 |
| YWHAZ      | 3 |
| MTSS1      | 3 |
| CASC7      | 3 |
| CCL19      | 3 |
| GLIPR2     | 3 |
| BX255923.3 | 3 |
| SEC61B     | 3 |
| TXN        | 3 |
| TRAF1      | 3 |
| FNBP1      | 3 |
| FCN1       | 3 |
| VIM-AS1    | 3 |
| VIM        | 3 |
| MAP3K8     | 3 |
| CREM       | 3 |
| PPA1       | 3 |
| NFKB2      | 3 |
| DUSP5      | 3 |
| ADAM8      | 3 |
| IRF7       | 3 |
| LSP1       | 3 |
| LDHA       | 3 |
| LDLRAD3    | 3 |
| C11orf96   | 3 |
| NRXN2      | 3 |

|               |   |
|---------------|---|
| FAU           | 3 |
| MALAT1        | 3 |
| CLCF1         | 3 |
| BIRC3         | 3 |
| OLR1          | 3 |
| BCL2L14       | 3 |
| PLEKHA5       | 3 |
| VDR           | 3 |
| PFDN5         | 3 |
| MYL6          | 3 |
| RAP1B         | 3 |
| SOCS2         | 3 |
| ELK3          | 3 |
| SLC41A2       | 3 |
| NAA25         | 3 |
| ANKLE2        | 3 |
| TPT1          | 3 |
| TBC1D4        | 3 |
| CTSG          | 3 |
| GZMB          | 3 |
| BAZ1A         | 3 |
| RPL36AL       | 3 |
| SRSF5         | 3 |
| SIPA1L1       | 3 |
| WARS          | 3 |
| GPR132        | 3 |
| CRIP1         | 3 |
| THBS1         | 3 |
| PKM           | 3 |
| ISG20         | 3 |
| TPSAB1        | 3 |
| USP7          | 3 |
| TVP23A        | 3 |
| NDE1          | 3 |
| CCL22         | 3 |
| CCL17         | 3 |
| CMTM2         | 3 |
| NFAT5         | 3 |
| GABARAPL2     | 3 |
| SLC7A5        | 3 |
| ANKRD11       | 3 |
| C17orf107     | 3 |
| TMEM107       | 3 |
| ALDOC         | 3 |
| CCR7          | 3 |
| EIF1          | 3 |
| CTD-2020K17.1 | 3 |

|           |   |
|-----------|---|
| DDX5      | 3 |
| ARHGDI1A  | 3 |
| MYL12B    | 3 |
| ALPK2     | 3 |
| MALT1     | 3 |
| HMSD      | 3 |
| SNRPB     | 3 |
| INSM1     | 3 |
| THBD      | 3 |
| CST7      | 3 |
| CHMP4B    | 3 |
| LINC00657 | 3 |
| CTNBL1    | 3 |
| TGM2      | 3 |
| PTPN1     | 3 |
| ADNP      | 3 |
| PMEPA1    | 3 |
| MOB3A     | 3 |
| GNA15     | 3 |
| EBI3      | 3 |
| CD70      | 3 |
| TRIP10    | 3 |
| CDC37     | 3 |
| PDE4A     | 3 |
| CHERP     | 3 |
| UBA52     | 3 |
| PBX4      | 3 |
| GRAMD1A   | 3 |
| PPP1R14A  | 3 |
| NCCRP1    | 3 |
| RPS16     | 3 |
| B9D2      | 3 |
| LYPD3     | 3 |
| RELB      | 3 |
| PTGIR     | 3 |
| FPR1      | 3 |
| VSTM1     | 3 |
| BID       | 3 |
| IGLL5     | 3 |
| UPB1      | 3 |
| NEFH      | 3 |
| APOBEC3A  | 3 |
| SAMSN1    | 3 |
| RUNX1     | 3 |
| RPL22     | 4 |
| UTS2      | 4 |
| PARK7     | 4 |

|          |   |
|----------|---|
| CTNNBIP1 | 4 |
| SRM      | 4 |
| FBXO6    | 4 |
| RCC2     | 4 |
| MRT04    | 4 |
| AKR7A2   | 4 |
| SRRM1    | 4 |
| STMN1    | 4 |
| HMG2     | 4 |
| NUDC     | 4 |
| THEMIS2  | 4 |
| PSMB2    | 4 |
| MRPS15   | 4 |
| NDUFS5   | 4 |
| YBX1     | 4 |
| ERI3     | 4 |
| UQCRH    | 4 |
| CMPK1    | 4 |
| HSPB11   | 4 |
| ITGB3BP  | 4 |
| SERBP1   | 4 |
| TYW3     | 4 |
| ACADM    | 4 |
| PRKACB   | 4 |
| PSMA5    | 4 |
| ATP5F1   | 4 |
| C1orf162 | 4 |
| MRPS21   | 4 |
| SCNM1    | 4 |
| MRPL9    | 4 |
| SNAPIN   | 4 |
| PMVK     | 4 |
| CKS1B    | 4 |
| SCAMP3   | 4 |
| LMNA     | 4 |
| CCT3     | 4 |
| APOA1BP  | 4 |
| MRPL24   | 4 |
| CD1C     | 4 |
| MNDA     | 4 |
| UFC1     | 4 |
| NDUFS2   | 4 |
| HSD17B7  | 4 |
| MPC2     | 4 |
| MRPS14   | 4 |
| ARPC5    | 4 |
| RGS18    | 4 |

|            |   |
|------------|---|
| RGS2       | 4 |
| SNRPE      | 4 |
| NUCKS1     | 4 |
| TRAF3IP3   | 4 |
| LYPLAL1    | 4 |
| PARP1      | 4 |
| MRPL55     | 4 |
| RNF187     | 4 |
| IRF2BP2    | 4 |
| HNRNPU     | 4 |
| ACP1       | 4 |
| RNASEH1    | 4 |
| DDX1       | 4 |
| HADHB      | 4 |
| SNX17      | 4 |
| SRSF7      | 4 |
| ZFP36L2    | 4 |
| TTC7A      | 4 |
| CALM2      | 4 |
| NFU1       | 4 |
| FAM136A    | 4 |
| PRADC1     | 4 |
| TPRKB      | 4 |
| MOB1A      | 4 |
| AUP1       | 4 |
| POLE4      | 4 |
| SUCLG1     | 4 |
| VAMP5      | 4 |
| PTCD3      | 4 |
| EIF5B      | 4 |
| RANBP2     | 4 |
| CHCHD5     | 4 |
| DDX18      | 4 |
| DBI        | 4 |
| GYPC       | 4 |
| MZT2B      | 4 |
| IMP4       | 4 |
| ARHGAP15   | 4 |
| ARL5A      | 4 |
| PSMD14     | 4 |
| WIPF1      | 4 |
| ATP5G3     | 4 |
| ITGA4      | 4 |
| PPIL3      | 4 |
| EEF1B2     | 4 |
| AC079767.4 | 4 |
| ARPC2      | 4 |

|          |   |
|----------|---|
| STK16    | 4 |
| SP110    | 4 |
| PTMA     | 4 |
| UBE2F    | 4 |
| MYEOV2   | 4 |
| PPP1R7   | 4 |
| HDLBP    | 4 |
| SEPT2    | 4 |
| DTYMK    | 4 |
| MTMR14   | 4 |
| ARPC4    | 4 |
| LSM3     | 4 |
| MRPS25   | 4 |
| SATB1    | 4 |
| CSRNP1   | 4 |
| RPSA     | 4 |
| ZDHHC3   | 4 |
| UQCRC1   | 4 |
| APEH     | 4 |
| CYB561D2 | 4 |
| ABHD14B  | 4 |
| TWF2     | 4 |
| SPCS1    | 4 |
| TKT      | 4 |
| APPL1    | 4 |
| CMSS1    | 4 |
| FILIP1L  | 4 |
| NDUFB4   | 4 |
| HCLS1    | 4 |
| CNBP     | 4 |
| MRPL3    | 4 |
| SRPRB    | 4 |
| GYG1     | 4 |
| SELT     | 4 |
| P2RY13   | 4 |
| RAP2B    | 4 |
| RPL22L1  | 4 |
| NDUFB5   | 4 |
| AP2M1    | 4 |
| PSMD2    | 4 |
| EIF4A2   | 4 |
| ATP5I    | 4 |
| RBPJ     | 4 |
| COMMD8   | 4 |
| IGJ      | 4 |
| PYURF    | 4 |
| HADH     | 4 |

|          |   |
|----------|---|
| OSTC     | 4 |
| SNHG8    | 4 |
| SCOC     | 4 |
| PRMT10   | 4 |
| RPS3A    | 4 |
| DCTD     | 4 |
| PDCD6    | 4 |
| NDUFS6   | 4 |
| DHX29    | 4 |
| TBCA     | 4 |
| JMY      | 4 |
| COX7C    | 4 |
| COMMD10  | 4 |
| HINT1    | 4 |
| DDX46    | 4 |
| H2AFY    | 4 |
| SIL1     | 4 |
| NDUFA2   | 4 |
| ZMAT2    | 4 |
| LARS     | 4 |
| CD74     | 4 |
| PTTG1    | 4 |
| NPM1     | 4 |
| HIGD2A   | 4 |
| CLTB     | 4 |
| NHP2     | 4 |
| MRS2     | 4 |
| ACOT13   | 4 |
| HIST1H4C | 4 |
| MRPS18B  | 4 |
| TUBB     | 4 |
| LST1     | 4 |
| CSNK2B   | 4 |
| LSM2     | 4 |
| C6orf48  | 4 |
| HLA-DRA  | 4 |
| HLA-DRB5 | 4 |
| HLA-DRB1 | 4 |
| HLA-DQA1 | 4 |
| HLA-DQB1 | 4 |
| HLA-DQA2 | 4 |
| HLA-DQB2 | 4 |
| PSMB9    | 4 |
| HLA-DPA1 | 4 |
| HLA-DPB1 | 4 |
| PFDN6    | 4 |
| UQCC2    | 4 |

|         |   |
|---------|---|
| RPS10   | 4 |
| SNRPC   | 4 |
| DEF6    | 4 |
| RPL10A  | 4 |
| FGD2    | 4 |
| PIM1    | 4 |
| CCDC167 | 4 |
| CNPY3   | 4 |
| HMG3    | 4 |
| NDUFA4  | 4 |
| GTF3C6  | 4 |
| IL22RA2 | 4 |
| SF3B5   | 4 |
| MRPL18  | 4 |
| C7orf50 | 4 |
| NUDT1   | 4 |
| C1GALT1 | 4 |
| RPA3    | 4 |
| AHR     | 4 |
| TOMM7   | 4 |
| CYCS    | 4 |
| CPVL    | 4 |
| GGCT    | 4 |
| LSM5    | 4 |
| AOAH    | 4 |
| MRPL32  | 4 |
| COA1    | 4 |
| BLVRA   | 4 |
| PPIA    | 4 |
| H2AFV   | 4 |
| CCT6A   | 4 |
| SUMF2   | 4 |
| WBSCR22 | 4 |
| RFC2    | 4 |
| MDH2    | 4 |
| TMEM243 | 4 |
| GATAD1  | 4 |
| ARPC1B  | 4 |
| ATP5J2  | 4 |
| COPS6   | 4 |
| FIS1    | 4 |
| IFRD1   | 4 |
| C7orf55 | 4 |
| MRPS33  | 4 |
| SSBP1   | 4 |
| GSTK1   | 4 |
| GIMAP7  | 4 |



|          |   |
|----------|---|
| GIMAP6   | 4 |
| TMSB4X   | 4 |
| EIF1AX   | 4 |
| NDUFB11  | 4 |
| HSD17B10 | 4 |
| MAGEH1   | 4 |
| PDZD11   | 4 |
| XIST     | 4 |
| BTK      | 4 |
| BEX4     | 4 |
| TCEAL8   | 4 |
| TSC22D3  | 4 |
| SLC25A5  | 4 |
| NDUFA1   | 4 |
| HTATSF1  | 4 |
| HMGB3    | 4 |
| IDH3G    | 4 |
| NAA10    | 4 |
| LAGE3    | 4 |
| MSRA     | 4 |
| TMEM66   | 4 |
| TM2D2    | 4 |
| VDAC3    | 4 |
| CEBPD    | 4 |
| PRKDC    | 4 |
| LYPLA1   | 4 |
| MRPL15   | 4 |
| TPD52    | 4 |
| C8orf59  | 4 |
| CPNE3    | 4 |
| DECR1    | 4 |
| UQCRB    | 4 |
| ZNF706   | 4 |
| MRPL13   | 4 |
| FAM49B   | 4 |
| PSCA     | 4 |
| GSDMD    | 4 |
| NAPRT1   | 4 |
| CYC1     | 4 |
| TMEM261  | 4 |
| BAG1     | 4 |
| GALT     | 4 |
| ANP32B   | 4 |
| SMC2     | 4 |
| KLF4     | 4 |
| GSN      | 4 |
| MRRF     | 4 |

|          |   |
|----------|---|
| RPL35    | 4 |
| MAPKAP1  | 4 |
| RPL12    | 4 |
| C9orf16  | 4 |
| COQ4     | 4 |
| ZDHHC12  | 4 |
| C9orf114 | 4 |
| TOR1A    | 4 |
| SURF1    | 4 |
| UBAC1    | 4 |
| CARD9    | 4 |
| TMEM141  | 4 |
| PHPT1    | 4 |
| FBXW5    | 4 |
| C9orf142 | 4 |
| MRPL41   | 4 |
| IDI1     | 4 |
| GDI2     | 4 |
| ATP5C1   | 4 |
| NUDT5    | 4 |
| RSU1     | 4 |
| APBB1IP  | 4 |
| RASSF4   | 4 |
| ALOX5    | 4 |
| TSPAN15  | 4 |
| PALD1    | 4 |
| MRPS16   | 4 |
| CHCHD1   | 4 |
| ADK      | 4 |
| GLUD1    | 4 |
| EXOC6    | 4 |
| ENTPD1   | 4 |
| EXOSC1   | 4 |
| BLOC1S2  | 4 |
| NDUFB8.1 | 4 |
| NPM3     | 4 |
| FBXL15   | 4 |
| PRDX3    | 4 |
| UROS     | 4 |
| GLRX3    | 4 |
| ECHS1    | 4 |
| RNH1     | 4 |
| TALDO1   | 4 |
| POLR2L   | 4 |
| MRPL23   | 4 |
| MRPL17   | 4 |
| RPL27A   | 4 |

|          |   |
|----------|---|
| RNF141   | 4 |
| PSMA1    | 4 |
| CAT      | 4 |
| COMMD9   | 4 |
| PSMC3    | 4 |
| NDUFS3   | 4 |
| PTPMT1   | 4 |
| TIMM10   | 4 |
| C11orf31 | 4 |
| TMEM109  | 4 |
| DDB1     | 4 |
| ASRGL1   | 4 |
| POLR2G   | 4 |
| RARRES3  | 4 |
| DNAJC4   | 4 |
| TRMT112  | 4 |
| RNASEH2C | 4 |
| FIBP     | 4 |
| DRAP1    | 4 |
| BANF1    | 4 |
| MRPL11   | 4 |
| CORO1B   | 4 |
| GSTP1    | 4 |
| NDUFS8   | 4 |
| COA4     | 4 |
| UCP2     | 4 |
| CLNS1A   | 4 |
| PRCP     | 4 |
| TMEM126B | 4 |
| C11orf73 | 4 |
| TAF1D    | 4 |
| TMEM123  | 4 |
| TIMM8B   | 4 |
| REXO2    | 4 |
| PAFAH1B2 | 4 |
| AMICA1   | 4 |
| ATP5L    | 4 |
| H2AFX    | 4 |
| UBASH3B  | 4 |
| HSPA8    | 4 |
| THYN1    | 4 |
| RAD51AP1 | 4 |
| NDUFA9   | 4 |
| MRPL51   | 4 |
| LAG3     | 4 |
| PTPN6    | 4 |
| ARHGDIB  | 4 |

|               |   |
|---------------|---|
| LDHB          | 4 |
| LYRM5         | 4 |
| FGFR1OP2      | 4 |
| MRPS35        | 4 |
| PRKAG1        | 4 |
| TUBA1B        | 4 |
| LIMA1         | 4 |
| BIN2          | 4 |
| PRR13         | 4 |
| ATP5G2        | 4 |
| COPZ1         | 4 |
| ZNF385A       | 4 |
| GTSF1         | 4 |
| PA2G4         | 4 |
| MYL6B         | 4 |
| ATP5B         | 4 |
| PTGES3        | 4 |
| SHMT2         | 4 |
| STAC3         | 4 |
| CDK4          | 4 |
| LYZ           | 4 |
| RP11-1143G9.4 | 4 |
| CCT2          | 4 |
| GLIPR1        | 4 |
| NAP1L1        | 4 |
| NDUFA12       | 4 |
| METAP2        | 4 |
| SNRPF         | 4 |
| LTA4H         | 4 |
| ISCU          | 4 |
| ARPC3         | 4 |
| GPN3          | 4 |
| PPP1CC        | 4 |
| ERP29         | 4 |
| PEBP1         | 4 |
| RPLP0         | 4 |
| COX6A1        | 4 |
| ANAPC5        | 4 |
| ARL6IP4       | 4 |
| TMED2         | 4 |
| PXMP2         | 4 |
| SAP18         | 4 |
| GTF3A         | 4 |
| HMGB1         | 4 |
| EPSTI1        | 4 |
| DNAJC15       | 4 |
| ESD           | 4 |

|           |   |
|-----------|---|
| EBPL      | 4 |
| SPRYD7    | 4 |
| RNASEH2B  | 4 |
| VPS36     | 4 |
| GPR183    | 4 |
| GAS6      | 4 |
| OSGEP     | 4 |
| APEX1     | 4 |
| RNASE2    | 4 |
| NDRG2     | 4 |
| OXA1L     | 4 |
| HAUS4     | 4 |
| PSMB5     | 4 |
| PSME2     | 4 |
| NEDD8     | 4 |
| FKBP3     | 4 |
| C14orf166 | 4 |
| ACTR10    | 4 |
| TIMM9     | 4 |
| CHURC1    | 4 |
| ZFP36L1   | 4 |
| COX16     | 4 |
| SLIRP     | 4 |
| FOXN3     | 4 |
| NDUFB1    | 4 |
| C14orf2   | 4 |
| PLD4      | 4 |
| EMC4      | 4 |
| SRP14     | 4 |
| DUT       | 4 |
| EID1      | 4 |
| GTF2A2    | 4 |
| RPL4      | 4 |
| UBL7      | 4 |
| COX5A     | 4 |
| IMP3      | 4 |
| WDR61     | 4 |
| TMED3     | 4 |
| SEC11A    | 4 |
| IDH2      | 4 |
| FES       | 4 |
| WASH4P    | 4 |
| POLR3K    | 4 |
| SNRNP25   | 4 |
| MPG       | 4 |
| NME4      | 4 |
| C16orf13  | 4 |

|          |   |
|----------|---|
| NME3     | 4 |
| MRPS34   | 4 |
| MLST8    | 4 |
| FLYWCH2  | 4 |
| THOC6    | 4 |
| CORO7    | 4 |
| HMOX2    | 4 |
| NAGPA    | 4 |
| EMP2     | 4 |
| UQCRC2   | 4 |
| GGA2     | 4 |
| TUFM     | 4 |
| CORO1A   | 4 |
| DCTPP1   | 4 |
| CHD9     | 4 |
| HERPUD1  | 4 |
| CIAPIN1  | 4 |
| CKLF     | 4 |
| NAE1     | 4 |
| COTL1    | 4 |
| COX4I1   | 4 |
| RNF166   | 4 |
| APRT     | 4 |
| SERPINF1 | 4 |
| TAX1BP3  | 4 |
| PSMB6    | 4 |
| SLC25A11 | 4 |
| PFN1     | 4 |
| RPAIN    | 4 |
| C1QBP    | 4 |
| CLEC10A  | 4 |
| ASGR1    | 4 |
| TMEM256  | 4 |
| ZBTB4    | 4 |
| LSMD1    | 4 |
| RANGRF   | 4 |
| ZSWIM7   | 4 |
| LGALS9   | 4 |
| EVI2B    | 4 |
| UTP6     | 4 |
| VPS25    | 4 |
| SLC25A39 | 4 |
| ATP5G1   | 4 |
| PHB      | 4 |
| NME1     | 4 |
| MMD      | 4 |
| SKA2     | 4 |

|           |   |
|-----------|---|
| DCAF7     | 4 |
| PSMC5     | 4 |
| GNA13     | 4 |
| PRKCA     | 4 |
| HN1       | 4 |
| MRPS7     | 4 |
| MIF4GD    | 4 |
| SLC25A19  | 4 |
| GALK1     | 4 |
| SYNGR2    | 4 |
| C17orf89  | 4 |
| ANAPC11   | 4 |
| STRA13    | 4 |
| DCXR      | 4 |
| GPS1      | 4 |
| CCDC57    | 4 |
| OGFOD3    | 4 |
| PSMG2     | 4 |
| TPGS2     | 4 |
| ATP5A1    | 4 |
| IER3IP1.1 | 4 |
| CYB5A     | 4 |
| TXNL4A    | 4 |
| PSMF1     | 4 |
| ITPA      | 4 |
| C20orf27  | 4 |
| TMEM230   | 4 |
| PCNA      | 4 |
| DSTN      | 4 |
| CST3      | 4 |
| APMAP     | 4 |
| ACSS1     | 4 |
| COMMD7    | 4 |
| AHCY      | 4 |
| DYNLRB1   | 4 |
| ERGIC3    | 4 |
| BLCAP     | 4 |
| CD40      | 4 |
| PFDN4     | 4 |
| ATP5E     | 4 |
| PSMA7     | 4 |
| PPDPF     | 4 |
| ATP5D     | 4 |
| MKNK2     | 4 |
| PLEKHJ1   | 4 |
| C19orf70  | 4 |
| NDUFA11   | 4 |

|            |       |   |
|------------|-------|---|
| ALKBH7     |       | 4 |
|            | 2-Mar | 4 |
| MYO1F      |       | 4 |
| EIF3G      |       | 4 |
| DNMT1      |       | 4 |
| MRPL4      |       | 4 |
| WDR83OS    |       | 4 |
| JUNB       |       | 4 |
| PRDX2      |       | 4 |
| GADD45GIP1 |       | 4 |
| C19orf53   |       | 4 |
| PKN1       |       | 4 |
| PGLS       |       | 4 |
| CCDC124    |       | 4 |
| IFI30      |       | 4 |
| LSM4       |       | 4 |
| NDUFA13    |       | 4 |
| URI1       |       | 4 |
| FXYD5      |       | 4 |
| POLR2I     |       | 4 |
| SPINT2     |       | 4 |
| KCNK6      |       | 4 |
| EIF3K      |       | 4 |
| ECH1       |       | 4 |
| MRPS12     |       | 4 |
| ZFP36      |       | 4 |
| EXOSC5     |       | 4 |
| RPS19      |       | 4 |
| PAFAH1B3   |       | 4 |
| ZNF428     |       | 4 |
| TRAPPC6A   |       | 4 |
| BAX        |       | 4 |
| CD37       |       | 4 |
| ALDH16A1   |       | 4 |
| ETFB       |       | 4 |
| UBE2S      |       | 4 |
| ISOC2      |       | 4 |
| ZNF524     |       | 4 |
| RPS5       |       | 4 |
| MRPL40     |       | 4 |
| TANGO2     |       | 4 |
| RANBP1     |       | 4 |
| CHCHD10    |       | 4 |
| SNRPD3     |       | 4 |
| RTCB       |       | 4 |
| TXN2       |       | 4 |
| LGALS2     |       | 4 |



|          |   |
|----------|---|
| POLR2F   | 4 |
| TOMM22   | 4 |
| APOBEC3C | 4 |
| RPL3     | 4 |
| TNRC6B   | 4 |
| ADSL     | 4 |
| ST13     | 4 |
| RBX1     | 4 |
| NHP2L1   | 4 |
| SMDT1    | 4 |
| NDUFA6   | 4 |
| RRP7A    | 4 |
| TSPO     | 4 |
| SAMM50   | 4 |
| PARVG    | 4 |
| DENND6B  | 4 |
| TYMP     | 4 |
| CCT8     | 4 |
| SOD1     | 4 |
| ATP5O    | 4 |
| PFKL     | 4 |
| SUMO3    | 4 |
| YBEY     | 4 |
| S100B    | 4 |
| PRMT2    | 4 |
